1 **Concerted cellular responses to type I interferon propel memory**  
2 **impairment associated with amyloid  $\beta$  plaques**

3 Ethan R. Roy<sup>1</sup>, Gabriel Chiu<sup>1</sup>, Sanming Li<sup>1</sup>, Nicholas E. Propson<sup>1,2</sup>, Hui Zheng<sup>1,3</sup>, Wei Cao<sup>1,3\*</sup>

4

5 1. Huffington Center on Aging, Baylor College of Medicine, Houston, TX, USA

6 2. Current address: Denali Therapeutics, South San Francisco, CA, USA

7 3. Department of Molecular and Human Genetics, Baylor College of Medicine, Houston, TX, USA

8

9

10

11

12

13

14

15 \*Correspondence:

16 Wei Cao One Baylor Plaza, BCM 230, Baylor College of Medicine, Houston, TX 77030, USA

17 (713) 798-8523 [wei.cao@bcm.edu](mailto:wei.cao@bcm.edu)

18

19 **Abstract**

20 Despite well-documented maladaptive neuroinflammation in Alzheimer's disease (AD), the  
21 principal signal that drives memory and cognitive impairment remains elusive. Here, we reveal  
22 robust, age-dependent cellular reactions to type I interferon (IFN), an innate immune cytokine  
23 aberrantly elicited by  $\beta$  amyloid plaques, and examine their role in cognition and neuropathology  
24 relevant to AD in a murine amyloidosis model. Long-term blockade of IFN receptor rescued both  
25 memory and synaptic deficits, and also resulted in reduced microgliosis, inflammation, and  
26 neuritic pathology. Interestingly, microglia-specific IFN receptor ablation attenuated the loss of  
27 post-synaptic terminals, whereas IFN signaling in neural cells contributed to pre-synaptic  
28 alteration and plaque accumulation. Intriguingly, IFN pathway activation displayed a strong  
29 inverse correlation with cognitive performance, promoting selective synapse engulfment by  
30 microglia rather than amyloid plaques. Overall, IFN signaling represents a critical module within  
31 the neuroinflammatory network of AD and prompts a concerted cellular state that is detrimental  
32 to memory and cognition.

33

34

35

36

37

38 **Keywords**

39 interferon; memory impairment, neuroinflammation; synapse; microglia; Alzheimer disease

## 40 Introduction

41 Alzheimer's disease (AD) is the main cause of dementia, characterized by memory  
42 impairment. Hallmarked by the deposition of  $\beta$ -amyloid plaques and accumulation of  
43 neurofibrillary tangles, AD pathogenesis manifests with complex interactions between different  
44 brain cell types (1). Collective histological, bioinformatic and molecular analyses have highlighted  
45 a perpetual activation of microglia, the brain resident immune cells, and remarkable connection  
46 of a number of AD risk polymorphisms and rare variants to microglia and innate immunity (2, 3).  
47 Despite an overwhelming consensus on the importance of neuroinflammatory responses, the core  
48 signal that disrupts cognition and memory in AD is not yet well understood.

49 Recently, we described a prominent antiviral immune response by microglia in multiple  
50 murine amyloid  $\beta$  models, as well as human AD (4). At the center of this branch of innate immunity  
51 are type I interferons (IFNs) and a large number of IFN-stimulated genes (ISGs), which usually  
52 confer an antiviral state in host cells. However, more light is being shed on the functions of these  
53 molecules in sterile central nervous system (CNS) inflammation. Recently, Hur et al. reported that  
54 IFITM3, an ISG, functions as an immune switch to increase  $\gamma$ -secretase activity, promoting APP  
55 cleavage and amyloid pathology (5). Meanwhile, microglial subsets with gene signatures of IFN  
56 response ("interferon-responsive microglia," or IRMs) have been identified from single-cell RNA-  
57 seq (scRNA-seq) studies on murine amyloid  $\beta$  models and human AD brains (6, 7). Moreover,  
58 polymorphisms in several ISGs were recognized as risk factor for AD (8), while upregulated IFN  
59 response was detected in AD patients carrying the *TREM2* R47H variant (9). Given these  
60 significant findings, in-depth analysis of the functional contribution of IFN pathway to AD  
61 pathogenesis is warranted.

62 We previously focused on young 5XFAD mice, a widely-studied A $\beta$  model, in which  
63 microglia innately responded to amyloid fibrils harboring nucleic acids (NA), activated IFN  
64 response pathway, and promoted acute, complement-dependent synapse elimination (4). Here,

65 we examined the accrual of IFN-activated microglia over time and assessed heterogeneity of IFN-  
66 responsive microglia. To determine the effects of IFN on cognitive function, plaque pathology,  
67 and neuroinflammation, we performed a long-term blockade in older 5XFAD mice with abundant  
68 plaques. We further analyzed 5XFAD mice deficient of IFN receptor in different cell lineages to  
69 reveal cell-type specific roles of IFN signaling. Overall, we find that IFN signaling via multiple cell  
70 types is essential for memory impairment and synaptic damage during amyloidosis.

71

72

## 73 **Results**

### 74 **Age-dependent cellular activation by IFN in amyloidosis**

75           Previously, we observed an age-dependent increase of NA-containing plaques in 5XFAD  
76 brains (4). Nucleic acids, when complexed to amyloid, serve as an immunogenic stimulus that  
77 elicits an IFN response (10). We thus detected microglia with active IFN signaling, marked by  
78 nuclear Stat1, exclusively near NA<sup>+</sup> amyloid plaques in young 5XFAD brains. To comprehensively  
79 examine the brain cells activated by IFN, we first generated a reporter mouse line (MxG) by  
80 crossing Mx1-Cre mice with the *ROSA26*<sup>mT/mG</sup> strain, in which IFN exposure results in *Mx1* (a  
81 well-known ISG) promoter-driven permanent GFP expression in responsive cells (11). These  
82 mice were then bred into the 5XFAD background and examined at different ages to gauge IFN  
83 signaling in the brain.

84           At 3 months, only a small number of GFP<sup>+</sup> cells were detected, most of which were  
85 identified as plaque-associated microglia, making up about 21% of all microglia in plaque-bearing  
86 regions (Fig. 1a,b). By 5 months, GFP<sup>+</sup> microglia became more prevalent and, by 11 months of  
87 age, GFP<sup>+</sup> cells represented a majority of the microglia in these plaque-rich regions. We  
88 previously showed that Axl protein, a receptor tyrosine kinase (RTK) and known ISG, is enriched  
89 in both Stat1<sup>+</sup> microglia surrounding amyloid plaques in mice, and neuritic plaques in human  
90 brains (4). As expected, we observed significant overlap of GFP and expression of Axl in microglia  
91 (Fig. 1c). In  $\beta$ -amyloidosis, a subset of microglia adopt a disease-associated microglia (DAM)  
92 phenotype, marked by high *Clec7a* expression (12, 13). To estimate the heterogeneity of IFN  
93 responsiveness within the DAM population, we quantified proportions of microglia in plaque-  
94 loaded regions of 5-month-old 5XFAD;MxG brains using GFP and *Clec7a* expression, and found  
95 that roughly half of *Clec7a*<sup>+</sup> cells were GFP<sup>+</sup> (Fig. 1d). This is consistent with elevated ISG  
96 transcripts detected in bulk *Clec7a*<sup>+</sup> microglia transcriptome from APP-PS1 mice (4), and more  
97 importantly reveals a distinct subpopulation within DAM marked by IFN responsiveness.

98 Interestingly, small numbers of astrocytes and blood vessels also expressed GFP in 5- and 11-  
99 month-old 5XFAD brains (Fig. S1a,b), suggesting IFN signaling goes beyond microglia amid  
100 accumulating CNS amyloidosis. Of note, we found that the MxG reporter yielded no GFP  
101 expression in neurons after direct brain administration of IFN, though numerous glial cells and  
102 blood vessels turned green (data not shown). Therefore, since neurons were unable to express  
103 the Mx1-Cre-dependent GFP readout, we later relied on other methods to detect IFN signaling in  
104 neurons.

105         These findings demonstrate a striking age-dependent accrual of IFN-activated brain cells,  
106 particularly microglia, and illuminate a degree of heterogeneity among plaque-associated  
107 microglia.

#### 108 **IFN blockade rescues memory and synaptic deficits without altering plaque load**

109         To examine the role of IFN in memory impairment, we implanted osmotic pumps with  
110 ventricular cannulae to administer an antibody that specifically blocks signaling of type I IFN  
111 receptor (IFNAR) into 4-month-old 5XFAD mice for 30 days (Fig. 2a). Mice were then subjected  
112 to Y maze and novel object recognition (NOR) assays to evaluate cognitive aspects related to  
113 memory loss, before brain tissues were subjected to detailed histological examination and gene  
114 expression analysis. As shown in Figure 2b, 5XFAD mice receiving isotype control IgG failed to  
115 show spatial novelty preference in the Y maze, as well as discriminate between novel and familiar  
116 objects in the NOR assay, indicating severe deficits in both working memory and short-term  
117 reference memory retrieval, respectively. In contrast, 5XFAD mice receiving blocking antibody  
118 behaved comparably to non-transgenic control mice, suggesting a full restoration of the memory  
119 deficits spurred by amyloid deposition.

120         We then performed histological characterization of the brain tissues to explore the  
121 neurophysiological basis for the marked reversal of memory loss. Examination of synapse

122 markers showed that 5XFAD mice administered control IgG had reduced levels of synaptophysin  
123 and PSD95 proteins, which label pre- and post-synaptic terminals on excitatory neurons,  
124 respectively, as well as in functional co-localization ( $\leq 200$  nm) of these markers (Fig. 2c).  
125 Consistent with the outcome of the cognitive assays, these proteins were both significantly  
126 elevated in 5XFAD mice with IFN blockade.

127         To understand the impact of IFN blockade on amyloid pathology, we stained plaques with  
128 Thioflavin S and anti-A $\beta$  antibody but failed to detect a significant difference in dense core plaque  
129 load, total A $\beta$  deposition or average plaque volume between 5XFAD mice with and without IFN  
130 blockade in any brain region (Fig. 2d; Fig. S2a). Microglia are the primary phagocytes of A $\beta$   
131 species, therefore modifying plaque burden. However, IFN blockade did not affect the amount of  
132 A $\beta$  taken up by microglia, nor decrease the level of microglial CD68, a lysosomal receptor involved  
133 in phagocytosis (Fig. S2b,c).

134         Therefore, type I IFN receptor signaling in the brain parenchyma damages memory and  
135 synapses during amyloidosis, and suppression of the pathway is sufficient to restore these deficits  
136 despite abundant plaque pathology.

### 137 **IFN blockade reduces microgliosis, inflammation, and neuritic pathologies**

138         For a deeper understanding of how chronic IFN signaling affects cells in the plaque  
139 microenvironment, we examined glia and peri-plaque neuritic structures in detail. IFN blockade  
140 effectively reduced Stat1 in the nuclei of both plaque-associated microglia and neurons, indicating  
141 broad suppression of excessive IFN signaling in these cells, thus validating the efficacy of the  
142 blockade strategy (Fig. 3a). We saw a partial reduction of total Iba1<sup>+</sup> area with IFN blockade in  
143 both cortex and subiculum, the latter an area with the earliest and densest plaque deposition (Fig.  
144 3b). In contrast, astrocyte reactivity markers were not significantly affected in either region (Fig.  
145 S3a,b). Further scrutiny of microglia showed that, on a per cell basis, IFN blockade significantly

146 reduced the levels of Axl and Clec7a expression (Fig. 3c), altogether implying an attenuation of  
147 microglial activation.

148 We next analyzed gene expression in hippocampal tissues from the experimental cohorts  
149 and found that IFN blockade not only significantly lowered the expression of ISGs, such as *Irf7*,  
150 *Ddx58* and *Slfn8*, as expected, but also decreased the levels of *Clec7a*, *Tnf* and *Ccl4*, suggesting  
151 a broader dampening effect on neuroinflammation in general (Fig. 3d).

152 Dystrophic neurites surrounding amyloid plaques represent another hallmark of AD. We  
153 found that both phospho-neurofilament<sup>+</sup> (pNF<sup>+</sup>) dystrophic axons and phosphorylated  
154 endogenous tau (CP13<sup>+</sup> pTau) within dystrophic neurites were partially but significantly  
155 diminished by IFN blockade in 5XFAD brain (Fig. 3e,f), implying an IFN-mediated mechanism in  
156 promoting these pathologies.

### 157 **Selective microglial *Ifnar1* ablation alters microglial activation and prevents post-synaptic** 158 **loss**

159 All nucleated mammalian cells express the type I IFN receptor and thus can respond to  
160 the cytokine. Although our analysis identified microglia as the earliest and primary responder to  
161 IFN, how instrumental microglia are in mediating IFN's overall effects in the brain is not known.  
162 We bred *Ifnar1*<sup>fl/fl</sup> with Cx3cr1-Cre<sup>ERT2</sup> mice, then crossed with the 5XFAD strain to generate mice  
163 lacking IFN receptor selectively in microglia (here termed 5XFAD;MKO). When FACS-sorted  
164 CD11b<sup>+</sup> and Cd11b<sup>-</sup> cells from the brains of MKO mice were analyzed, significant reduction of  
165 *Ifnar1* was detected, in conjunction with decreased ISGs, only in the Cd11b<sup>+</sup> population,  
166 confirming the selective knockout in microglia (Fig. S4). Also consistent with this, Stat1 protein  
167 was noticeably absent in plaque-associated microglia in 5XFAD;MKO brains (Fig. 4a).

168 Similar to IFN blockade, microglia in 5-month-old 5XFAD;MKO mice showed a reduction  
169 of Iba1<sup>+</sup> area and significantly less Axl expression on a per cell basis (Fig. 4b). However, Clec7a



170 and CD68 levels were not affected. 5XFAD;MKO mice expressed significantly less ISG transcripts,  
171 such as *Irf7*, *Oas1* and *Ifi2712a*, while maintaining the expression of classical DAM markers, such  
172 as *Clec7a*, *Trem2* and *Cst7* (Fig. 4c). These findings suggest that microglial IFN signaling  
173 selectively regulates a subset of molecular changes observed in plaque-associated microglia.

174 Examination of synaptic markers revealed an unexpected effect – while both pre- and  
175 post-synapses were reduced in normal 5XFAD brains, PSD95<sup>+</sup> puncta density, but not  
176 synaptophysin<sup>+</sup>, was restored in 5XFAD;MKO (Fig. 4d). We also examined dystrophic neuronal  
177 structures and found that pTau levels were significantly reduced by ablating microglia-specific IFN  
178 signaling, despite comparable axonal dystrophy (Fig. S5e). Altogether, these results hint at a  
179 selective function of IFN signaling in microglial activation and synapse modification.

#### 180 **Neural *Ifnar1* ablation reduces amyloid plaques and restores pre-synaptic terminals**

181 To understand the importance of IFN signaling in non-microglia cells in the brain, we bred  
182 *Ifnar1<sup>fl/fl</sup>* and Nestin-Cre mice to generate 5XFAD mice with the type I IFN receptor ablated in  
183 neuroectodermal-derived cells, including neurons and glial cells other than microglia (here termed  
184 5XFAD;NKO). Consistent with the conditional knockout, Stat1 signal in 5XFAD;NKO neuronal  
185 nuclei was significantly reduced (Fig. 5a). Of note, we did not detect overt accumulation of LC3B-  
186 II or protein hyper-ubiquitination in the brains of adult *Ifnar1<sup>fl/fl</sup>*;Nestin-Cre mice as reported (14),  
187 nor decreased expression of endogenous or transgenic full-length amyloid precursor protein (APP)  
188 with conditional *Ifnar1* ablation, as reported to be affected by germline *Ifnar1* deletion (15) (Fig.  
189 S5a).

190 In contrast to IFN blockade and microglia-specific *Ifnar1* ablation, 5XFAD;NKO mice at 5  
191 months accumulated fewer ThioS<sup>+</sup> and 6E10<sup>+</sup> plaques in different brain regions (Fig. 5b).  
192 Measurement of A $\beta$  inside microglial CD68<sup>+</sup> vesicles indicated unaltered plaque phagocytosis by  
193 microglia (Fig. S5b). Since IFITM3 was shown to function as an inflammation-triggered switch to

194 enhance A $\beta$  production (5), we investigated the possible involvement of this ISG. First, we  
195 confirmed a sensitive and dose-dependent induction of Ifitm3 protein in primary neurons by  
196 IFN $\beta$  (Fig. S5c). Further, we confirmed the upregulation of Ifitm3 protein in dystrophic neurites, a  
197 known site of heightened A $\beta$  production and release, as well as in astrocytes in 5XFAD brains  
198 (Fig. S5d). Interestingly, a selective diminution of Ifitm3 was detected in 5XFAD;NKO, but not  
199 5XFAD;MKO, mice (Fig. 5c). Neural IFN signaling did not have a major impact on overall  
200 dystrophic neuronal structures (Fig. S5e).

201         On synaptic regulation, 5XFAD;NKO displayed an opposing phenotype to 5XFAD;MKO,  
202 such that synaptophysin<sup>+</sup> puncta levels, but not PSD95<sup>+</sup>, were restored, implying a neural-intrinsic  
203 and IFN-dependent regulation of pre-synaptic bouton density during disease (Fig. 5d). Activity-  
204 dependent events shape neuronal networks in part by elimination of inactive synapses, a  
205 mechanism critical for proper configuration of circuits. In post-natal brain, Stat1 signaling at  
206 inactive pre-synaptic terminals is instrumental for synapse refinement (16). To gauge the  
207 relevance of this axis in pre-synaptic loss during  $\beta$  amyloidosis, we employed an antibody against  
208 Stat1 phosphorylated at Tyr701 (pStat1) and detected enhanced frequency of pStat1<sup>+</sup> pre-  
209 synaptic boutons in 5XFAD brain (Fig. S5f,g), suggesting a potential functional involvement. In  
210 5XFAD;NKO subicula, a significantly lower percentage of Syp<sup>+</sup> pre-synapses were pStat1 positive  
211 compared to 5XFAD (Fig. 5e). In accordance, fewer pStat1<sup>+</sup> puncta were present in the nuclei of  
212 CA1 neurons, which project to the subiculum (Fig. S5h).

213         Overall, these findings reveal pathogenic effects of type I IFN signaling in non-microglial  
214 brain cells on plaque formation and synaptic pathology.

### 215 **Interrogation of AD-related pathological processes in cognitive performance**

216         Although we detected cell-type specific effects of IFN signaling on multiple AD-related  
217 pathologies, the relative importance of each process in the clinically relevant disease

218 manifestation, *i.e.* cognition and memory impairment, remains unclear. We thus constructed a  
219 database containing gene expression profiles, numerous neuropathological parameters, and  
220 behavioral outcomes from the cohort of 5XFAD mice that underwent IFN blockade treatment to  
221 perform unbiased correlation analysis. As shown in Figure 6a, ordering profiled genes from  
222 strongest negative to strongest positive correlates with performance in Y maze revealed that ISGs  
223 were heavily enriched among genes most strongly associated with poor cognition. IRF7 is a  
224 master transcriptional regulator of type I IFN-dependent immune response (4). *Irf7* levels were  
225 negatively correlated with Y maze performance, highlighting a pathogenic effect of IFN pathway  
226 on memory (Fig. 6a,e).

227 For neuropathology parameters, we found strong positive correlations of Y maze  
228 performance with PSD95/synaptophysin co-localized synapses, as well as with overall PSD95<sup>+</sup>  
229 synapse density, and to a lesser extent with synaptophysin<sup>+</sup> synapse density (Fig. 6b).

230 Although amyloid plaques represent a cardinal pathology of AD, we did not observe  
231 significant correlation of ThioS<sup>+</sup> or 6E10<sup>+</sup> plaque load with Y maze performance (Fig. 6c).  
232 Dystrophic axons, which were partially sensitive to IFN (Fig. 3e), displayed weak negative  
233 correlation with Y maze performance (Fig. 6d). Reactive astrocytes are known to participate in  
234 neurodegenerative processes. However, readouts of GFAP protein signal and C3 mRNA, which  
235 is primarily produced by reactive astrocytes, did not correlate with memory capacity in this cohort  
236 (Fig. 6c,d).

237 Although microglial reactivity is highly influenced by  $\beta$  amyloidosis, whether activated  
238 states of these cells protect or harm the brain function remains controversial. We found that both  
239 overall microgliosis marked by Iba1 levels and DAM generation marked by Clec7a levels within  
240 microglia showed strong inverse correlations with Y maze performance (Fig 6e).

241 Hence, these findings suggest a potent negative impact of IFN and microglia on memory  
242 and cognition under the context of amyloid deposition.

### 243 **IFN signaling promotes microglia-mediated synaptic engulfment**

244 Previously we showed that post-synaptic loss in 3-month-old 5XFAD brain was coupled  
245 with type I IFN-stimulated uptake by microglia (4). We did not detect any change in overall pre-  
246 synaptic density nor microglial pre-synaptic engulfment, implying that synapse loss is restricted  
247 to the post-synaptic compartment early in disease, and is IFN- and microglia-dependent. Given  
248 the concurrent synaptic deficits in pre- and post-synaptic elements (Fig. 2c) and seemingly  
249 differential cellular requirements for IFN signaling (Figs. 4, 5) in mid-stage 5XFAD mice, we sought  
250 to further investigate microglia in synapse modification.

251 First, synaptic engulfment assays showed that microglia in 5-month-old 5XFAD brain  
252 selectively engulfed enhanced amounts of PSD95<sup>+</sup> puncta, an activity dependent on extracellular  
253 IFN (Fig. 7a) and necessarily mediated by IFN receptor in microglia (Fig. 7b). Consistent with this,  
254 more PSD95 was detected inside GFP<sup>+</sup> microglia over GFP<sup>-</sup> counterparts in plaque-rich regions  
255 of 5XFAD;MxG mice at 5 months (Fig. 7c). In contrast, no enhanced synaptophysin<sup>+</sup> signal was  
256 detected inside microglia from 5XFAD brains, with or without IFN signaling, compared to control  
257 mice (Fig. 7a, b), suggesting a selective post-synaptic elimination by microglia, persisting at  
258 different stages of disease.

259 We previously showed that IFN-activated microglia rapidly remove dendritic spines in a  
260 complement C3-dependent manner (4). Although IFN was sufficient in inducing many members  
261 of the complement cascade in wild-type mice, blockade of extracellular IFN or genetic IFN  
262 receptor ablation in 5XFAD mice did not reduce complement transcription (Fig. S7a,b), consistent  
263 with unchanged C3 protein in astrocytes (Fig. S3b). This indicates that signals other than IFN may  
264 play a role in chronic complement activation in older 5XFAD mice.

265 Perineuronal nets (PNN) are extracellular matrix structures that enwrap and stabilize  
266 neuronal synapses, loss of which in 5XFAD was shown to be mediated by microglia (17). Although  
267 *Wisteria floribunda* agglutinin (WFA) staining confirmed a significant reduction of PNN structures  
268 in disease, IFN blockade did not appear to affect their levels (Fig. S7c), excluding a direct link  
269 between IFN and PNN modification.

270 Axl is a member of the TAM (Tyro3, Axl, and Mer) family RTKs that play important roles  
271 in phagocytosis of apoptotic cells (18). Recently, a plaque-centric expression pattern of TAM  
272 receptors and their ligand Gas6 was reported to engage microglia with amyloid plaques in a  
273 largely Mer-dependent manner (19). Given the high sensitivity of microglial Axl to IFN signaling,  
274 we investigated its relation to synapses, together with Mer and Gas6. Employing high-  
275 magnification confocal imaging, we detected specific, punctate signals for Gas6 as well as both  
276 Axl and Mer in wild-type brain (Fig. S7d), which interestingly displayed non-random co-localization  
277 with synaptic puncta (Fig. S7e), indicating a physiological interaction of TAM molecules with  
278 synapses. In diseased brain, we observed notable Gas6 deposition on amyloid plaques and  
279 enhanced Mer expression in plaque-associated microglia (Fig. S7f,g), in agreement with Huang  
280 et al (19). However, unlike Axl, Mer expression in microglia, as well as extent of Gas6 deposition  
281 on plaques, were not IFN-dependent. At the synaptic structures, we found substantial Gas6  
282 deposition on PSD95<sup>+</sup> synaptic terminals in 5XFAD brains, which was accompanied by  
283 significantly increased Axl, but not Mer, co-localization with PSD95 (Fig. 7d). To visualize the  
284 physical relationship between Axl and synapses, we analyzed dendritic spines of 5XFAD mice  
285 containing the Thy1-eGFP reporter. High-magnification confocal imaging revealed the formation  
286 of contact points between GFP<sup>+</sup> dendritic spines and Axl<sup>+</sup> microglial processes, which were  
287 significantly more frequent along dendrites in 5XFAD mice (Fig. 7e), substantiating a direct  
288 contact of Axl with synapses.

289           To explore the role of Axl receptor in synapse uptake, we examined PSD95 engulfment  
290 by different subpopulations of microglia from control and 5XFAD brains, particularly Clec7a<sup>+</sup>  
291 plaque-associated microglia with varying expression of Axl, and detected robust per-cell  
292 correlation of Axl and PSD95 occupancy in microglia (Fig. 7f). To test whether Axl and/or Gas6  
293 localization to synapses is dependent on IFN signaling, we measured the frequency of Axl/PSD95  
294 and Gas6/PSD95 co-localization in 5XFAD mice treated with IgG or  $\alpha$ IFNAR, and found that  
295 colocalization of both Axl receptor and Gas6 ligand to synapses was reduced with IFN blockade,  
296 a finding which was mirrored by microglial conditional *Ifnar1* deletion (Fig. 7g), suggesting a  
297 reversible, IFN-induced post-synaptic engulfment machinery in microglia during disease. In line  
298 with this, Axl protein and mRNA levels displayed a strong positive correlation with PSD95  
299 engulfment, and negative correlations with PSD95 density and Y maze performance (Fig. 7h,  
300 S6a). Altogether, these data pinpoint an IFN-instructed synapse elimination program in microglia  
301 that compromises memory.

302

## 303 Discussion

304 Beyond antiviral function, type I IFN is linked to cognitive and neuropsychiatric dysfunction  
305 in various clinical contexts (4, 20). Previous studies describe that IFN modifies the brain through  
306 microglia activation, neural stem cell dysfunction, and disruption of whole-brain functional network  
307 connectivity (4, 21). Of the neuropathological features of AD, synapse loss appears early and  
308 correlates most strongly with dementia, and thus represents a key step of the disease process  
309 (22). Our current study reveals for the first time discrete and coordinated actions of IFN-stimulated  
310 brain cells in compromising synapses, the central cause of memory impairment, under the sterile  
311 inflammatory condition initiated by AD pathology (Fig S8).

312 A growing number of microglia populations are being identified by scRNA-seq analyses,  
313 revealing different activation states under various physiological or pathological conditions (23).  
314 While cells enriched with DAM markers were identified first, IRMs were subsequently recognized  
315 as a distinct subset of microglia arising in AD and brain aging (6, 7, 24). Moreover, a microglial  
316 proteome analysis revealed that IFN pathway was activated early and persisted in murine A $\beta$   
317 models (25), in line with our findings that microglial IFN response universally accompanies brain  
318 amyloidosis *in vivo* (4). Using a genetically-encoded IFN-responsive reporter system, we  
319 documented an age-dependent, brain-wide, and profound accrual of brain cells responding to IFN  
320 signaling activation in the 5XFAD model. In young mice, a sparse population of microglia were  
321 the principal IFN-responsive cell-type, consistent with the results obtained with Stat1 staining (4).  
322 By 5 months, despite overwhelming presence of NA<sup>+</sup> plaques, no more than half of plaque-  
323 associated Clec7a<sup>+</sup> microglia expressed GFP, revealing an interesting aspect of microglial  
324 heterogeneity. Given the higher percentage of cells turning green at older age, microglia seem to  
325 be activated by IFN continuously as amyloidosis progresses. It is also worth noting that over 90%  
326 of GFP<sup>+</sup> microglia retained Clec7a expression, which implies that microglia maintain DAM  
327 markers after IFN activation. As GFP<sup>+</sup> microglia accumulated alongside the increasing plaque

328 load, other brain cells also became GFP<sup>+</sup>, revealing a more complex IFN response than previously  
329 appreciated. Many brain cell types participate in plaque formation and neuritic pathology, a  
330 process marked by a multicellular co-expression network of plaque-induced genes (PIGs) (26).  
331 We found that 22 of the 57 PIG module are CNS ISGs (4, 27, 28), many of which overlap with the  
332 markers of DAM and neurotoxic reactive astrocytes (29) (Fig. S9), highlighting a profound  
333 influence of IFN in the dysregulated cellular network in the vicinity of plaques.

334 We obtained apparently conflicting results on whether IFN signaling affects plaque  
335 pathology: blocking IFN receptor did not (Fig. 2d), while neural *Ifnar1* deletion partially reduced  
336 plaque load (Fig. 5b). The latter observation was correlated with significantly tempered *Ifitm3*  
337 expression, in keeping with the activity of *Ifitm3* in promoting APP cleavage and amyloid pathology  
338 (5). Paradoxically, *Ifitm3* was unaltered with IFN blockade (Fig. S2d), implying a difference  
339 between extracellular IFN blocking and genetic ablation. One possible explanation comes from  
340 clinical observation with therapeutic  $\alpha$ IFNAR antibodies that IFN has more persistent effects in  
341 cells devoid of negative IFN regulators ISG15 and USP18 (30). Interestingly, cortical neurons do  
342 not express *Isg15* or *Usp18* (both are ISGs) even after IFN exposure, a contrast to microglia (27,  
343 28). Given the sensitive neuronal response of *Ifitm3* induction by IFN (Fig. S5c), it is plausible  
344 that, under IFNAR blockade, residual IFN receptor signaling was sufficient to maintain the levels  
345 of *Ifitm3*. Of note, not all neuronal IFN signaling escaped extracellular blockade, as neuronal  
346 pStat1 and total Stat1 proteins were similarly reduced by antibody-mediated blockade (Figs. S2e,  
347 3a) and genetic ablation of *Ifnar1* in neural cells (Fig. 5a,e).

348 Another unique pathological hallmark of AD is the swollen pre-synaptic dystrophic neurites  
349 surrounding amyloid plaques, which accumulate APP as well as  $\beta$ - and  $\gamma$ -secretases, and serve  
350 as localized sites of A $\beta$  generation and release (31, 32). As we have shown (Fig. 5), neural IFN  
351 signaling was required for *Ifitm3* expression, which is known to enhance  $\gamma$ -secretase activity.  
352 Remarkably,  $\beta$ -secretase expression is also reportedly regulated by interferon and Stat1 (33, 34),



353 implying a sweeping effect of IFN on APP processing. Overall, our results support a feed-forward  
354 A $\beta$ -plaque-IFN-A $\beta$  loop whereby inflammation stimulates factors that exacerbate AD pathology.

355 We discovered that synaptophysin<sup>+</sup> boutons were selectively diminished by IFN signaling  
356 in neural-derived cells (Fig. 5d), in sharp contrast to the regulation of post-synaptic densities (Fig.  
357 4d). A Jak2-Stat1 axis was recently identified as a major neuron-autonomous determinant to  
358 eliminate inactive synapses *in vivo* (16). Interestingly, Stat1 functions not only as a negative  
359 regulator of spatial memory formation in wild-type mice, but is also a key mediator of A $\beta$ -induced  
360 learning and memory deficits (35, 36). We found increased pre-synaptic pStat1 in 5XFAD, which  
361 was reduced upon IFN blockade or ablation (Figs. 5e, S2e). Collectively, the experimental  
362 evidence strongly supports a novel neuronal IFN-Stat1 axis that pathogenically modulates the  
363 pre-synapse in AD (Fig S8).

364 While microglia prune synapses during normal CNS development, excessive removal can  
365 result in pathological synapse loss in diverse neurological and neuropsychiatric diseases (37). In  
366  $\beta$ -amyloidosis models, germline C3 deficiency protects from loss of synapses and neurons (38,  
367 39), and microglia engulf C1q-tagged post-synaptic components early in the disease (40). Despite  
368 the strong relationship between IFN and complement in young 5XFAD mice, we found  
369 unexpectedly that IFN signaling became dispensable in eliciting complement expression in 5-  
370 month-old animals, likely reflecting the influences of other prevailing proinflammatory signals. It  
371 should be noted that, in the same cohort, IFN blockade was effective to blunt *Tnf* and *Clec7a*  
372 expression, similar to the treatment effects in 10- to 12-month-old APP<sup>NL-G-F</sup> mice (4).

373 Besides complement, microglia use myriad other surface receptors to engulf or otherwise  
374 limit synapses (41-44). Interestingly, several synapse-eliminating receptors recognize a common  
375 neuronal cue (45): phosphatidylserine (PS), a well-known “eat-me” signal for phagocytosis. The  
376 principal myeloid phagocytic receptors, Axl and Mer, detect PS exposed on apoptotic cells via

377 their ligand Gas6, which displays high affinity towards PS (18). In CNS, Mer facilitates astrocytic  
378 phagocytosis of synapses in developing and adult brain (46), and can also engage plaques in AD  
379 (19). Yet, the function of Axl in brain, despite its prominent upregulation in plaque-associated  
380 microglia in AD, is unknown. Intriguingly, we discovered a highly IFN-dependent Axl expression  
381 in microglia surrounding amyloid plaques (Fig 3,4), As reported (19), we found *Mertk* mRNA  
382 positively correlated with dense-core plaques (Fig. S6c). Contrary to Mer, IFN blockade and  
383 microglial *Ifnar1* deletion effectively reduced Axl levels but failed to modify the plaques, in line  
384 with *Axl* deficiency in APP/PS1 model (19). On the other hand, we demonstrate for the first time  
385 direct contact between Axl and synapses, which were highly tagged by Gas6 in  $\beta$ -amyloidosis,  
386 and enrichment of synaptic material inside Axl<sup>+</sup> microglia, all of which were IFN-dependent. While  
387 Mer expression displayed no association with either memory or synapse levels, Axl abundance  
388 was robustly and inversely correlated with memory performance (Fig. S6a,b). Interestingly, both  
389 soluble AXL and GAS6 levels increase in cerebrospinal fluid of AD patients (47, 48), consistent  
390 with the elevated Axl expression in human AD (4)(Fig. S7h). These intriguing findings warrant  
391 further characterization of a pathogenic involvement of microglial Axl in AD.

392 We present evidence that IFN signaling plays a role in phosphorylation of endogenous tau  
393 at neuritic plaques (Fig. 3), which constitutes a major type of AD-relevant tau pathology and,  
394 notably, has been shown to enable AD-tau spreading *in vivo* (49). Although uncertain how IFN  
395 modulates tau together with other peri-plaque dystrophies, we were intrigued by the report that  
396 increased IRMs were associated with heightened endogenous tau phosphorylation in *Trem2*-  
397 deficient APP/tau double transgenic mice (50). Hence, the mechanism by which IFN-mediated  
398 signaling connects amyloid and tau pathologies in AD, and whether IFN pathway represents a  
399 feasible therapeutic target, are of great interest.

400

401 **Acknowledgements**

402 The study was funded by NIH grants AG057587 (W.C. and H.Z.); AG020670 (H.Z.), AG062257  
403 (H.Z.), NS093652 (H.Z.), BrightFocus ADR A20183775 (W.C.) and Brown Foundation 2020  
404 Healthy Aging Initiative (W.C.). We acknowledge technical assistance from Haiying Liu, Nadia  
405 Aithmitti, and Bianca Contreras, and express gratitude to Dr. Andre Catic for generously providing  
406 MxG founder mice.

407

408 **Author Contributions**

409 Conceptualization, E.R.R. and W.C.; Methodology, E.R.R., G.C. and S. L.; Formal Analysis,  
410 E.R.R.; Investigation, E.R.R., G.C. and S. L.; Resources, N.E.P.; Writing- Original Draft, E.R.R.,  
411 and W.C.; Writing- Review & Editing, E.R.R. and W.C.; Visualization, E.R.R.; Supervision, W.C.;  
412 Project Administration, W.C.; Funding Acquisition, H.Z., and W.C.

413

414 **Declaration of Interests**

415 The authors declare no competing interests.

416 **Figure Legends**

417 **Fig. 1: Progressive IFN signaling in 5XFAD brain.**

418 **a**, GFP expression upon Mx1-Cre-driven recombination in the mT/mG reporter line crossed to the  
419 5XFAD model. Representative images of 5XFAD and nTg control brains at 3 months ( $n = 3$  control,  
420  $n = 3$  5XFAD), 5 months ( $n = 3$  control,  $n = 3$  5XFAD), and 11 months ( $n = 2$  control,  $n = 2$  5XFAD)  
421 of age, showing age-dependent expansion of IFN-responsive GFP<sup>+</sup> cells throughout plaque-  
422 bearing regions (scale bar, 250  $\mu$ m).

423 **b**, Representative confocal images of tissues from **a** co-labelled with Iba1 with quantification  
424 below, showing an IFN-responsive GFP<sup>+</sup> subset of plaque-associated microglia that expand in an  
425 age-dependent manner (3 months:  $n = 75$  cells from 3 animals; 5 months:  $n = 301$  cells 3 animals;  
426 11 months:  $n = 140$  cells from 2 animals; scale bar, 20  $\mu$ m).

427 **c**, Representative image of a 5-month-old 5XFAD animal ( $n = 3$  animals) revealing that Axl is  
428 expressed primarily in the GFP<sup>+</sup> subset of microglia (solid arrowheads) over the GFP<sup>-</sup> subset  
429 (hollow arrowheads). Scale bar, 20  $\mu$ m.

430 **d**, Representative images from 5 month old 5XFAD brains showing both GFP<sup>+</sup> and GFP<sup>-</sup> cells  
431 (left) and varying Axl expression (middle) among the plaque-associated Clec7a<sup>+</sup> subset of  
432 microglia, revealing significant heterogeneity of MGnD microglia in the plaque environment (scale  
433 bars, 15  $\mu$ m). (Right) Quantification of microglial subtypes at 5 months using Iba1, Clec7a, and  
434 IFN-responsive GFP reporter expression ( $n = 408$  cells from 3 animals).

435

436

437

438

439

440 **Fig. 2: Long-term IFN blockade rescues memory and synaptic deficits without altering**  
441 **plaque load.**

442 **a**, Schematic depicting long-term i.c.v. administration of  $\alpha$ IFNAR or IgG control to 4-month-old  
443 control or 5XFAD mice via mini osmotic pumps with brain ventricular cannulae. After 30 days mice  
444 were subjected to behavioral assays to assess memory loss and then harvested for brain tissue  
445 analyses. NOR: novel object recognition.

446 **b**, Results of behavioral assays. Ctrl + IgG,  $n = 13$  animals; Ctrl +  $\alpha$ IFNAR,  $n = 11$  animals; 5XFAD  
447 + IgG,  $n = 11$  animals; 5XFAD +  $\alpha$ IFNAR,  $n = 11$  animals. Data represent means and s.e.m.  
448 Statistics for Y maze were performed with ordinary one-way ANOVA ( $P < 0.001$ ,  $F_{42} = 33.46$ ) and  
449 Bonferroni's multiple-comparisons test. ns, not significant; \*\*\* $P < 0.001$ . Statistics for NOR were  
450 performed with two-way ANOVA ( $P < 0.001$ ,  $F_{84} = 28.36$ ) and Tukey's multiple-comparisons test.  
451 ns, not significant; \*\*\* $P < 0.001$ .

452 **c**, Representative high-magnification images of pre-synapses, marked by synaptophysin, and  
453 post-synapses, marked by PSD95, in subicula of treated Ctrl and 5XFAD animals (scale bar, 3  
454  $\mu$ m). Quantification of relative densities of synaptic markers, and the density of functional synapse  
455 pairs (<200nm distance between puncta). Ctrl + IgG,  $n = 13$  animals; Ctrl +  $\alpha$ IFNAR,  $n = 11$   
456 animals; 5XFAD + IgG,  $n = 11$  animals; 5XFAD +  $\alpha$ IFNAR,  $n = 11$  animals. Data represent means  
457 and s.e.m. Statistics were performed with ordinary one-way ANOVA (Syp:  $P < 0.001$ ,  $F_{42} = 6.659$ ;  
458 PSD95:  $P < 0.001$ ,  $F_{42} = 15.36$ ; Co-localized pairs:  $P < 0.001$ ,  $F_{42} = 15.98$ ) and Bonferroni's  
459 multiple-comparisons test. ns, not significant; \*\* $P < 0.01$ ; \*\*\* $P < 0.001$ .

460 **d**, Histological examination of plaque burden in plaque-bearing regions after long-term  
461 administration of  $\alpha$ IFNAR using 6E10 antibody to mark A $\beta$  fibrils, and thioflavin S to mark dense  
462 core plaques (scale bar, 500  $\mu$ m). Quantifications of plaque load for both markers in relevant brain

463 regions. 5XFAD + IgG,  $n = 11$  animals; 5XFAD +  $\alpha$ IFNAR,  $n = 11$  animals. Data represent means  
464 and s.e.m. Statistics were performed with two-tailed  $t$ -tests. ns, not significant.

465

466

467

468

469

470

471

472

473

474

475

476

477

478

479

480

481

482

483 **Fig. 3: Long-term IFN blockade reduces microgliosis, inflammation, dystrophic axons, and**  
484 **neuritic tau.**

485 **a**, Representative images of Stat1 levels, a marker of IFN activation, in the brains of 5XFAD  
486 animals treated with IgG ( $n = 11$  animals) or  $\alpha$ IFNAR ( $n = 11$  animals). Insets show isolated Stat1  
487 channels from boxed areas, highlighting microglia (solid boxes) and NeuN<sup>+</sup> neuronal nuclei  
488 (dashed boxes). Scale bar, 30  $\mu$ m.

489 **b**, Images of Iba1 staining in the cortex and hippocampus of treated 5XFAD animals (scale bar,  
490 500  $\mu$ m), and quantifications of % Iba1 area. Ctrl + IgG,  $n = 13$  animals; Ctrl +  $\alpha$ IFNAR,  $n = 11$   
491 animals; 5XFAD + IgG,  $n = 12$  animals; 5XFAD +  $\alpha$ IFNAR,  $n = 12$  animals. Data represent means  
492 and s.e.m. Statistics were performed with ordinary one-way ANOVA (CTX:  $P < 0.001$ ,  $F_{44} = 50.84$ ;  
493 SUB:  $P < 0.001$ ,  $F_{44} = 74.94$ ) and Bonferroni's multiple-comparisons test. ns, not significant;  
494 \* $P < 0.05$ ; \*\* $P < 0.01$ ; \*\*\* $P < 0.001$ .

495 **c**, Representative images of plaque-associated microglia in treated 5XFAD animals expressing  
496 Axl and Clec7a (isolated in insets; scale bar, 30  $\mu$ m), with quantification of microglial occupancy  
497 of both markers. Ctrl + IgG,  $n = 13$  animals; Ctrl +  $\alpha$ IFNAR,  $n = 11$  animals; 5XFAD + IgG,  $n = 11$   
498 animals; 5XFAD +  $\alpha$ IFNAR,  $n = 11$  animals. Data represent means and s.e.m. Statistics were  
499 performed with ordinary one-way ANOVA (Axl:  $P < 0.001$ ,  $F_{42} = 42.24$ ; Clec7a:  $P < 0.001$ ,  $F_{42} =$   
500 41.77) and Bonferroni's multiple-comparisons test. ns, not significant; \*\* $P < 0.01$ ; \*\*\* $P < 0.001$ .

501 **d**, Gene expression alterations with  $\alpha$ IFNAR treatment as measured by Nanostring analysis. Ctrl  
502 + IgG,  $n = 9$  animals; Ctrl +  $\alpha$ IFNAR,  $n = 8$  animals; 5XFAD + IgG,  $n = 8$  animals; 5XFAD +  
503  $\alpha$ IFNAR,  $n = 10$  animals. Data represent means and s.e.m. Statistics were performed with  
504 ordinary one-way ANOVA (*Irf7*:  $P = 0.007$ ,  $F_{31} = 4.923$ ; *Ddx58*:  $P < 0.001$ ,  $F_{31} = 9.283$ ; *Slnf8*:  $P$   
505  $< 0.001$ ,  $F_{31} = 9.086$ ; *Clec7a*:  $P < 0.001$ ,  $F_{31} = 42.99$ ; *Tnf*:  $P = 0.036$ ,  $F_{31} = 3.228$ ; *Ccl4*:  $P < 0.001$ ,

506  $F_{31} = 18.83$ ) and Bonferroni's multiple-comparisons test. ns, not significant; \* $P < 0.05$ ; \*\* $P < 0.01$ ;  
507 \*\*\* $P < 0.001$ .

508 **e**, Representative images and quantification of LAMP1<sup>+</sup> dystrophic neurites (DNs) and phospho-  
509 neurofilament<sup>+</sup> (pNF<sup>+</sup>) dystrophic axons (DAs) surrounding methoxy-X04<sup>+</sup> amyloid plaques in  
510 subicula of treated animals (scale bar, 20  $\mu\text{m}$ ). 5XFAD + IgG,  $n = 11$  animals; 5XFAD +  $\alpha\text{IFNAR}$ ,  
511  $n = 12$  animals. Data represent means and s.e.m. Statistics were performed with two-tailed  $t$ -tests.  
512 \*\* $P < 0.01$ .

513 **f**, Representative image of CP13<sup>+</sup> aggregated tau foci inside LAMP1<sup>+</sup> DN in the subiculum of a  
514 5XFAD animal (insets show isolated channels for CP13 and total tau; scale bar, 30  $\mu\text{m}$ ), and  
515 quantification of CP13<sup>+</sup> occupancy in DN after treatment with IgG or  $\alpha\text{IFNAR}$ . 5XFAD + IgG,  $n =$   
516 11 animals; 5XFAD +  $\alpha\text{IFNAR}$ ,  $n = 12$  animals. Data represent means and s.e.m. Statistics were  
517 performed with two-tailed  $t$ -test. \*\* $P < 0.01$ .

518

519

520

521

522

523

524

525

526



527 **Fig. 4: Selective microglial IFNAR ablation alters reactive microglial phenotype and**  
528 **prevents post-synaptic loss.**

529 **a**, Representative images of Stat1 expression in the plaque environment of 5XFAD animals with  
530 microglia-specific deletion of *Ifnar1* (“5XFAD;MKO”;  $n = 8$  animals) compared to *Ifnar1*-sufficient  
531 5XFAD animals (“5XFAD”;  $n = 7$  animals) (insets show isolated Stat1 channel in plaque-  
532 associated microglia; scale bar, 30  $\mu\text{m}$ ).

533 **b**, Quantifications of total % Iba1<sup>+</sup> area and activation marker occupancy (CD68, Axl, and Clec7a)  
534 on a per microglia basis by region. For Iba1, Axl, and Clec7a: Ctrl,  $n = 9$  animals; Ctrl;MKO,  $n =$   
535 6 animals; 5XFAD,  $n = 7$  animals; 5XFAD;MKO,  $n = 8$  animals. For Cd68: Ctrl,  $n = 4$  animals;  
536 Ctrl;MKO,  $n = 4$  animals; 5XFAD,  $n = 4$  animals; 5XFAD;MKO,  $n = 4$  animals. Data represent  
537 means and s.e.m. Statistics were performed with ordinary one-way ANOVA (Iba1, CTX:  $P < 0.001$ ,  
538  $F_{34} = 73.93$ ; Iba1, SUB:  $P < 0.001$ ,  $F_{34} = 212.6$ ; Cd68, CTX:  $P < 0.001$ ,  $F_{12} = 38.45$ ; Cd68, SUB:  $P$   
539  $< 0.001$ ,  $F_{12} = 72.61$ ; Axl, CTX:  $P < 0.001$ ,  $F_{26} = 12.52$ ; Axl, SUB:  $P < 0.001$ ,  $F_{26} = 43.68$ ; Clec7a,  
540 CTX:  $P < 0.001$ ,  $F_{26} = 8.893$ ; Clec7a, SUB:  $P < 0.001$ ,  $F_{26} = 10.29$ ) and Bonferroni’s multiple-  
541 comparisons test. ns, not significant; \*\*\* $P < 0.001$ .

542 **c**, Relative expression of ISGs and microglial activation markers. Ctrl,  $n = 13$  animals; Ctrl;MKO,  
543  $n = 4$  animals; 5XFAD,  $n = 12$  animals; 5XFAD;MKO,  $n = 4$  animals. Data represent means and  
544 s.e.m. Statistics were performed with ordinary one-way ANOVA (*Irf7*:  $P < 0.001$ ,  $F_{29} = 9.300$ ; *Oas1*:  
545  $P < 0.001$ ,  $F_{29} = 13.41$ ; *Ilf127l2a*:  $P < 0.001$ ,  $F_{29} = 11.79$ ; *Clec7a*:  $P < 0.001$ ,  $F_{29} = 27.77$ ; *Trem2*:  $P$   
546  $< 0.001$ ,  $F_{29} = 18.19$ ; *Cst7*:  $P < 0.001$ ,  $F_{29} = 30.97$ ) and Bonferroni’s multiple-comparisons test. ns,  
547 not significant; \* $P < 0.05$ ; \*\* $P < 0.01$ ; \*\*\* $P < 0.001$ .

548 **d**, High-magnification confocal images of pre- and post-synaptic puncta marked by synaptophysin  
549 and PSD95, respectively, in subicula of Ctrl ( $n = 9$  animals), Ctrl;MKO ( $n = 6$  animals), 5XFAD ( $n$   
550  $= 7$  animals), and 5XFAD;MKO ( $n = 8$  animals). Scale bar, 3  $\mu\text{m}$ . Quantification of relative synaptic

551 puncta densities. Data represent means and s.e.m. Statistics were performed with ordinary one-  
552 way ANOVA (Syp:  $P < 0.001$ ,  $F_{26} = 25.05$ ; PSD95:  $P < 0.001$ ,  $F_{26} = 19.92$ ) and Bonferroni's  
553 multiple-comparisons test. ns, not significant; \*\*\* $P < 0.001$ .

554

555

556

557

558

559

560

561

562

563

564

565

566

567

568

569

570

571 **Fig. 5: Selective neural IFNAR ablation reduces plaque load and prevents pre-synaptic loss.**

572 **a**, Representative images of Stat1 expression in plaque environment in 5XFAD animals with  
573 neural-specific deletion of *Ifnar1* (“5XFAD;NKO”;  $n = 7$  animals) compared to *Ifnar1*-sufficient  
574 5XFAD animals (“5XFAD”;  $n = 7$  animals) (insets show isolated Stat1 channel in outlined NeuN<sup>+</sup>  
575 neuronal nuclei; scale bar, 30  $\mu\text{m}$ ).

576 **b**, Histological examination of plaque burden in plaque-bearing regions of 5XFAD ( $n = 9$  animals),  
577 5XFAD;MKO ( $n = 9$  animals), and 5XFAD;NKO ( $n = 7$  animals) using thioflavin S to mark dense  
578 core plaques, and 6E10 antibody to mark all A $\beta$  fibrils (scale bar, 500  $\mu\text{m}$ ). Quantification (below)  
579 of percent area of plaque markers by brain region. Data represent means and s.e.m. Statistics  
580 were performed with two-tailed *t*-tests. ns, not significant; \* $P < 0.05$ ; \*\* $P < 0.01$ .

581 **c**, Representative images and quantification of Ifitm3 signals localized inside LAMP1<sup>+</sup> DNPs and  
582 GFAP<sup>+</sup> astrocytes (scale bar, 20  $\mu\text{m}$ ). 5XFAD,  $n = 4$  animals; 5XFAD;MKO,  $n = 4$  animals;  
583 5XFAD;NKO,  $n = 5$  animals. Data represent means and s.e.m. Statistics were performed with  
584 two-tailed *t*-tests. ns, not significant; \*\*\* $P < 0.001$ .

585 **d**, High-magnification confocal images (scale bar, 3  $\mu\text{m}$ ) and relative density quantifications of  
586 pre- and post-synaptic puncta marked by synaptophysin and PSD95, respectively, in subicula of  
587 Ctrl ( $n = 9$  animals), Ctrl;NKO ( $n = 3$  animals), 5XFAD ( $n = 7$  animals), and 5XFAD;NKO ( $n = 7$   
588 animals). Data represent means and s.e.m. Statistics were performed with ordinary one-way  
589 ANOVA (Syp:  $P < 0.001$ ,  $F_{22} = 14.72$ ; PSD95:  $P < 0.001$ ,  $F_{22} = 21.26$ ) and Bonferroni’s multiple-  
590 comparisons test. ns, not significant; \*\*\* $P < 0.001$ .

591 **e**, High-magnification confocal images (scale bar, 3  $\mu\text{m}$ ) and quantification of pStat1<sup>+</sup> puncta co-  
592 localized with Syp<sup>+</sup> synapses in subiculum. Ctrl,  $n = 4$  animals; Ctrl;NKO,  $n = 3$  animals; 5XFAD,  
593  $n = 6$  animals; 5XFAD;NKO,  $n = 7$  animals. Data represent means and s.e.m. Statistics were

594 performed with ordinary one-way ANOVA ( $P < 0.001$ ,  $F_{16} = 16.99$ ) and Bonferroni's multiple-  
595 comparisons test. ns, not significant; \*\* $P < 0.01$ ; \*\*\* $P < 0.001$ .

596

597

598

599

600

601

602

603

604

605

606

607

608

609

610

611

612

613

614 **Fig. 6: Memory impairment correlates with IFN signaling, synaptic pathology, and**  
615 **microglial reactivity.**

616 **a**, Nanostring gene expression analysis of hippocampal tissues from IgG- or  $\alpha$ IFNAR-treated  
617 control or 5XFAD animals (1 animal per row; Ctrl + IgG,  $n = 9$  animals; Ctrl +  $\alpha$ IFNAR,  $n = 8$   
618 animals; 5XFAD + IgG,  $n = 8$  animals; 5XFAD +  $\alpha$ IFNAR,  $n = 10$  animals). Top lanes: Genes  
619 identified as ISGs are marked with green. All genes are ranked (left to right) by their Pearson  
620 correlation ( $r$ ) with impaired performance in Y maze. Correlations with NOR are also included.  
621 Several top inverse correlates are highlighted at bottom.

622 **b-e**, Correlation analyses (Pearson  $r$ ) of Y maze performance with numerous histopathological  
623 and transcriptional ( $n = 34$  animals profiled) readouts from control and 5XFAD animals treated  
624 with IgG or  $\alpha$ IFNAR ( $n = 46$  total animals, groups as listed in **a**), including synaptic densities (**b**,  $n$   
625 = 46 animals), plaque-related parameters (**c**,  $n = 22$  animals), neuritic pathology parameters (**d**,  
626  $n = 22$  animals), and microglial activation markers (**e**,  $n = 46$  animals). Simple linear regression  
627 lines (solid) with 95% CI intervals (dashed) were added to plots, as are Pearson  $r$  and associated  
628  $P$  values. Plots were colored by  $r$  value as follows:  $1 > r > 0.65$ , yellow;  $0.65 > r > 0.55$ , light green;  
629  $0.55 > r > 0.45$ , dark green;  $0.45 > r > 0.35$ , blue;  $r < 0.35$ , dark purple.

630

631 **Fig. 7: Post-synapses are preferential engulfed by IFN-stimulated Axl<sup>+</sup> microglia**

632 **a**, Representative images of microglia in relation to synaptic markers in subicula of treated 5XFAD  
633 animals as in Figure 2 (scale bar, 5  $\mu$ m). Quantification of microglial engulfment of both markers.  
634 Ctrl + IgG,  $n = 13$  animals; Ctrl +  $\alpha$ IFNAR,  $n = 11$  animals; 5XFAD + IgG,  $n = 11$  animals; 5XFAD  
635 +  $\alpha$ IFNAR,  $n = 11$  animals. Data represent means and s.e.m. Statistics were performed with  
636 ordinary one-way ANOVA (Syp:  $P = 0.0717$ ,  $F_{42} = 2.510$ ; PSD95:  $P < 0.001$ ,  $F_{42} = 19.23$ ) and  
637 Bonferroni's multiple-comparisons test. ns, not significant; \*\*\* $P < 0.001$ .

638 **b**, Quantification of microglial engulfment of pre- and post-synaptic puncta in subicula of Ctrl ( $n =$   
639 5 animals for Syp,  $n = 9$  animals for PSD95), Ctrl;MKO ( $n = 2$  animals for Syp,  $n = 6$  animals for  
640 PSD95), 5XFAD ( $n = 3$  animals for Syp,  $n = 7$  animals for PSD95), and 5XFAD;MKO ( $n = 4$   
641 animals for Syp,  $n = 8$  animals for PSD95). Data represent means and s.e.m. Statistics were  
642 performed with ordinary one-way ANOVA (Syp:  $P = 0.688$ ,  $F_{10} = 0.5038$ ; PSD95:  $P < 0.001$ ,  $F_{26} =$   
643 44.28) and Bonferroni's multiple-comparisons test. ns, not significant; \*\*\* $P < 0.001$ .

644 **c**, Quantification of relative uptake of PSD95<sup>+</sup> post-synaptic puncta by GFP<sup>-</sup> ( $n = 19$  cells) and  
645 GFP<sup>+</sup> microglia ( $n = 21$  cells) from 5-month-old 5XFAD;MxG animals ( $n = 3$  animals). Data are  
646 presented as a violin plot with medians (dashed lines) and quartiles (dotted lines). Statistics were  
647 performed with two-tailed  $t$ -test. \*\*\* $P < 0.001$ .

648 **d**, Representative high-magnification confocal images of PSD95<sup>+</sup> post-synapses in proximity  
649 ( $\leq 200$  nm) to TAM receptors Axl and Mer, and TAM ligand Gas6 (scale bar, 2  $\mu$ m). Quantification  
650 of co-localization, as relative percent of PSD95<sup>+</sup> puncta, of the three molecules with PSD95 (Axl  
651 + PSD95:  $n = 13$  Ctrl images,  $n = 17$  5XFAD images; Mer + PSD95:  $n = 14$  Ctrl images,  $n = 15$   
652 5XFAD images; Gas6 + PSD95:  $n = 7$  Ctrl images,  $n = 6$  5XFAD images). Data represent means  
653 and s.e.m. of images from  $n = 4$  animals per genotype. Statistics were performed with two-tailed  
654  $t$ -tests. \*\*\* $P < 0.001$ .

655 **e**, Representative high-magnification confocal image of Axl<sup>+</sup> microglial processes contacting  
656 dendritic spines (arrow) in a 5XFAD mouse on the Thy1-eGFP background (scale bar, 2  $\mu$ m), and  
657 quantification of relative frequency of observed contacts between control ( $n = 42$  dendrites  $>10$   
658  $\mu$ m long from  $n = 8$  animals) and 5XFAD mice ( $n = 44$  dendrites  $>10$   $\mu$ m long from  $n = 8$  animals).  
659 Data represent means and s.e.m. Statistics were performed with two-tailed  $t$ -test. \*\*\* $P < 0.001$ .

660 **f**, Representative confocal image of Clec7a<sup>+</sup> microglia with varying degrees of Axl expression in  
661 relation to PSD95<sup>+</sup> post-synapses in a 5-month-old 5XFAD animal (scale bar, 20  $\mu$ m). Histological  
662 analysis of single microglia in both control and 5XFAD brains stratified by levels of Clec7a and  
663 Axl expression, showing relative amounts of PSD95<sup>+</sup> synaptic uptake in each category. Ctrl  
664 Iba1<sup>+</sup>Clec7a<sup>-</sup>,  $n = 17$  cells; 5XFAD Iba1<sup>+</sup>Clec7a<sup>-</sup>,  $n = 19$  cells; 5XFAD Clec7a<sup>+</sup>Axl<sup>-</sup>,  $n = 37$  cells;  
665 5XFAD Clec7a<sup>+</sup>Axl<sup>low</sup>,  $n = 35$  cells; 5XFAD Clec7a<sup>+</sup>Axl<sup>high</sup>,  $n = 32$  cells; all cells combined from  $n$   
666 = 2 Ctrl animals and  $n = 3$  5XFAD animals at 5 months. Data are presented as a violin plot with  
667 medians (dashed lines) and quartiles (dotted lines). Statistics were performed with ordinary one-  
668 way ANOVA ( $P < 0.001$ ,  $F_{135} = 95.97$ ) with Bonferroni's multiple-comparisons test. ns, not  
669 significant; \*\*\* $P < 0.001$ . Pearson  $r$  at right was calculated by correlation analysis of Axl expression  
670 and PSD95<sup>+</sup> uptake in all Clec7a<sup>+</sup> cells.

671 **g**, Quantified co-localization of Axl and Gas6 with PSD95, as relative percent of the synaptic  
672 puncta, in 5XFAD animals treated with IgG ( $n = 11$  animals) or  $\alpha$ IFNAR ( $n = 11$  animals), and in  
673 *Ifnar1* microglia conditional KO lines (5XFAD,  $n = 7$  animals; 5XFAD;MKO,  $n = 8$  animals). Data  
674 represent means and s.e.m. Statistics were performed with two-tailed  $t$ -tests. \*\* $P < 0.01$ ;  
675 \*\*\* $P < 0.001$ .

676 **h**, Correlation analyses (Pearson  $r$ ) of post-synaptic density, engulfment, and Y maze  
677 performance with the extent of Axl expression in microglia by histological analysis in 5XFAD  
678 animals treated with IgG or  $\alpha$ IFNAR ( $n = 46$  total animals, groups as listed in Figure 6a). Simple

679 linear regression lines (solid) with 95% CI intervals (dashed) were added to plots, as are Pearson  
680  $r$  and associated  $P$  values.

681

682

683

684

685

686

687

688

689

690

691

692

693



694 **References**

- 695 1. B. De Strooper, E. Karran, The Cellular Phase of Alzheimer's Disease. *Cell* **164**, 603-615 (2016).
- 696 2. B. Zhang *et al.*, Integrated systems approach identifies genetic nodes and networks in late-onset  
697 Alzheimer's disease. *Cell* **153**, 707-720 (2013).
- 698 3. K. L. Huang *et al.*, A common haplotype lowers PU.1 expression in myeloid cells and delays onset  
699 of Alzheimer's disease. *Nat. Neurosci.* **20**, 1052-1061 (2017).
- 700 4. E. R. Roy *et al.*, Type I interferon response drives neuroinflammation and synapse loss in  
701 Alzheimer disease. *J. Clin. Invest.* **130**, 1912-1930 (2020).
- 702 5. J. Y. Hur *et al.*, The innate immunity protein IFITM3 modulates gamma-secretase in Alzheimer's  
703 disease. *Nature* **586**, 735-740 (2020).
- 704 6. C. Sala Frigerio *et al.*, The Major Risk Factors for Alzheimer's Disease: Age, Sex, and Genes  
705 Modulate the Microglia Response to Abeta Plaques. *Cell Rep* **27**, 1293-1306 e1296 (2019).
- 706 7. M. Olah *et al.*, Single cell RNA sequencing of human microglia uncovers a subset associated with  
707 Alzheimer's disease. *Nat Commun* **11**, 6129 (2020).
- 708 8. D. A. Salih *et al.*, Genetic variability in response to amyloid beta deposition influences  
709 Alzheimer's disease risk. *Brain Commun* **1**, fcz022 (2019).
- 710 9. O. Korvatska *et al.*, Triggering Receptor Expressed on Myeloid Cell 2 R47H Exacerbates Immune  
711 Response in Alzheimer's Disease Brain. *Frontiers in immunology* **11**, 559342 (2020).
- 712 10. J. Di Domizio *et al.*, Nucleic acid-containing amyloid fibrils potently induce type I interferon and  
713 stimulate systemic autoimmunity. *Proc Natl Acad Sci U S A* **109**, 14550-14555 (2012).
- 714 11. N. E. Propson, E. R. Roy, A. Litvinchuk, J. Kohl, H. Zheng, Endothelial C3a receptor mediates  
715 vascular inflammation and blood-brain barrier permeability during aging. *J. Clin. Invest.* **131**  
716 (2021).
- 717 12. H. Keren-Shaul *et al.*, A Unique Microglia Type Associated with Restricting Development of  
718 Alzheimer's Disease. *Cell* **169**, 1276-1290 e1217 (2017).
- 719 13. S. Krasemann *et al.*, The TREM2-APOE Pathway Drives the Transcriptional Phenotype of  
720 Dysfunctional Microglia in Neurodegenerative Diseases. *Immunity* **47**, 566-581 e569 (2017).
- 721 14. P. Ejlertskov *et al.*, Lack of Neuronal IFN-beta-IFNAR Causes Lewy Body- and Parkinson's Disease-  
722 like Dementia. *Cell* **163**, 324-339 (2015).
- 723 15. M. R. Minter *et al.*, Deletion of the type-1 interferon receptor in APPSWE/PS1DeltaE9 mice  
724 preserves cognitive function and alters glial phenotype. *Acta neuropathologica communications*  
725 **4**, 72 (2016).
- 726 16. M. Yasuda, S. Nagappan-Chettiar, E. M. Johnson-Venkatesh, H. Umemori, An activity-dependent  
727 determinant of synapse elimination in the mammalian brain. *Neuron* **109**, 1333-1349 e1336  
728 (2021).
- 729 17. J. D. Crapser *et al.*, Microglia facilitate loss of perineuronal nets in the Alzheimer's disease brain.  
730 *EBioMedicine* **58**, 102919 (2020).
- 731 18. G. Lemke, How macrophages deal with death. *Nat Rev Immunol* **19**, 539-549 (2019).
- 732 19. Y. Huang *et al.*, Microglia use TAM receptors to detect and engulf amyloid beta plaques. *Nat.*  
733 *Immunol.* **22**, 586-594 (2021).
- 734 20. C. Fritz-French, W. Tyor, Interferon-alpha (IFNalpha) neurotoxicity. *Cytokine Growth Factor Rev.*  
735 **23**, 7-14 (2012).
- 736 21. L. S. Zheng *et al.*, Mechanisms for interferon-alpha-induced depression and neural stem cell  
737 dysfunction. *Stem Cell Reports* **3**, 73-84 (2014).
- 738 22. R. M. Koffie, B. T. Hyman, T. L. Spires-Jones, Alzheimer's disease: synapses gone cold. *Molecular*  
739 *neurodegeneration* **6**, 63 (2011).

- 740 23. M. Prinz, T. Masuda, M. A. Wheeler, F. J. Quintana, Microglia and Central Nervous System-  
741 Associated Macrophages-From Origin to Disease Modulation. *Annu. Rev. Immunol.* **39**, 251-277  
742 (2021).
- 743 24. T. R. Hammond *et al.*, Single-Cell RNA Sequencing of Microglia throughout the Mouse Lifespan  
744 and in the Injured Brain Reveals Complex Cell-State Changes. *Immunity* **50**, 253-271 e256 (2019).
- 745 25. L. Sebastian Monasor *et al.*, Fibrillar Abeta triggers microglial proteome alterations and  
746 dysfunction in Alzheimer mouse models. *Elife* **9**, doi: 10.7554/eLife.54083 (2020).
- 747 26. W. T. Chen *et al.*, Spatial Transcriptomics and In Situ Sequencing to Study Alzheimer's Disease.  
748 *Cell* **182**, 976-991 e919 (2020).
- 749 27. W. Li *et al.*, Microglia have a more extensive and divergent response to interferon-alpha  
750 compared with astrocytes. *Glia* **66**, 2058-2078 (2018).
- 751 28. H. Cho *et al.*, Differential innate immune response programs in neuronal subtypes determine  
752 susceptibility to infection in the brain by positive-stranded RNA viruses. *Nat. Med.* **19**, 458-464  
753 (2013).
- 754 29. S. A. Liddelow *et al.*, Neurotoxic reactive astrocytes are induced by activated microglia. *Nature*  
755 **541**, 481-487 (2017).
- 756 30. J. B. Altman *et al.*, Type I IFN is siloed in endosomes. *Proc Natl Acad Sci U S A* **117**, 17510-17512  
757 (2020).
- 758 31. K. R. Sadleir *et al.*, Presynaptic dystrophic neurites surrounding amyloid plaques are sites of  
759 microtubule disruption, BACE1 elevation, and increased Abeta generation in Alzheimer's  
760 disease. *Acta Neuropathol* **132**, 235-256 (2016).
- 761 32. R. Sanchez-Varo *et al.*, Abnormal accumulation of autophagic vesicles correlates with axonal and  
762 synaptic pathology in young Alzheimer's mice hippocampus. *Acta Neuropathol* **123**, 53-70  
763 (2012).
- 764 33. H. J. Cho *et al.*, IFN-gamma-induced BACE1 expression is mediated by activation of JAK2 and  
765 ERK1/2 signaling pathways and direct binding of STAT1 to BACE1 promoter in astrocytes. *Glia*  
766 **55**, 253-262 (2007).
- 767 34. H. J. Cho *et al.*, Constitutive JAK2/STAT1 activation regulates endogenous BACE1 expression in  
768 neurons. *Biochem. Biophys. Res. Commun.* **386**, 175-180 (2009).
- 769 35. W. L. Hsu, Y. L. Ma, D. Y. Hsieh, Y. C. Liu, E. H. Lee, STAT1 negatively regulates spatial memory  
770 formation and mediates the memory-impairing effect of Abeta. *Neuropsychopharmacology :  
771 official publication of the American College of Neuropsychopharmacology* **39**, 746-758 (2014).
- 772 36. D. J. Tai, W. L. Hsu, Y. C. Liu, Y. L. Ma, E. H. Lee, Novel role and mechanism of protein inhibitor of  
773 activated STAT1 in spatial learning. *EMBO J.* **30**, 205-220 (2011).
- 774 37. D. K. Wilton, L. Dissing-Olesen, B. Stevens, Neuron-Glia Signaling in Synapse Elimination. *Annu.  
775 Rev. Neurosci.* **42**, 107-127 (2019).
- 776 38. Q. Shi *et al.*, Complement C3 deficiency protects against neurodegeneration in aged plaque-rich  
777 APP/PS1 mice. *Sci Transl Med* **9**, eaaf6295 (2017).
- 778 39. T. Wu *et al.*, Complement C3 Is Activated in Human AD Brain and Is Required for  
779 Neurodegeneration in Mouse Models of Amyloidosis and Tauopathy. *Cell Rep* **28**, 2111-2123  
780 e2116 (2019).
- 781 40. S. Hong *et al.*, Complement and microglia mediate early synapse loss in Alzheimer mouse  
782 models. *Science* **352**, 712-716 (2016).
- 783 41. F. Filipello *et al.*, The Microglial Innate Immune Receptor TREM2 Is Required for Synapse  
784 Elimination and Normal Brain Connectivity. *Immunity* **48**, 979-991 e978 (2018).
- 785 42. L. Cheadle *et al.*, Sensory Experience Engages Microglia to Shape Neural Connectivity through a  
786 Non-Phagocytic Mechanism. *Neuron* **108**, 451-468 e459 (2020).

- 787 43. T. Li *et al.*, A splicing isoform of GPR56 mediates microglial synaptic refinement via  
788 phosphatidylserine binding. *EMBO J.* **39**, e104136 (2020).
- 789 44. N. Scott-Hewitt *et al.*, Local externalization of phosphatidylserine mediates developmental  
790 synaptic pruning by microglia. *EMBO J.* **39**, e105380 (2020).
- 791 45. G. Peet, F. C. Bennett, M. L. Bennett, Please eat (only part) of me: synaptic phosphatidylserine  
792 cues microglia to feast: Two new studies identify how a common apoptotic cell flag is used to  
793 sculpt neural circuits. *EMBO J.* **39**, e105924 (2020).
- 794 46. W.-S. Chung *et al.*, Astrocytes mediate synapse elimination through MEGF10 and MERTK  
795 pathways. *Nature* **504**, 394 (2013).
- 796 47. P. P. Sainaghi *et al.*, Growth Arrest Specific 6 Concentration is Increased in the Cerebrospinal  
797 Fluid of Patients with Alzheimer's Disease. *Journal of Alzheimer's disease : JAD* **55**, 59-65 (2017).
- 798 48. N. Mattsson *et al.*, CSF protein biomarkers predicting longitudinal reduction of CSF beta-  
799 amyloid42 in cognitively healthy elders. *Transl Psychiatry* **3**, e293 (2013).
- 800 49. Z. He *et al.*, Amyloid-beta plaques enhance Alzheimer's brain tau-seeded pathologies by  
801 facilitating neuritic plaque tau aggregation. *Nat. Med.* **24**, 29-38 (2018).
- 802 50. S. H. Lee *et al.*, Trem2 restrains the enhancement of tau accumulation and neurodegeneration  
803 by beta-amyloid pathology. *Neuron* **109**, 1283-1301 e1286 (2021).

804

805

806

807

808

809

810

811

812

813

**Fig. 1**

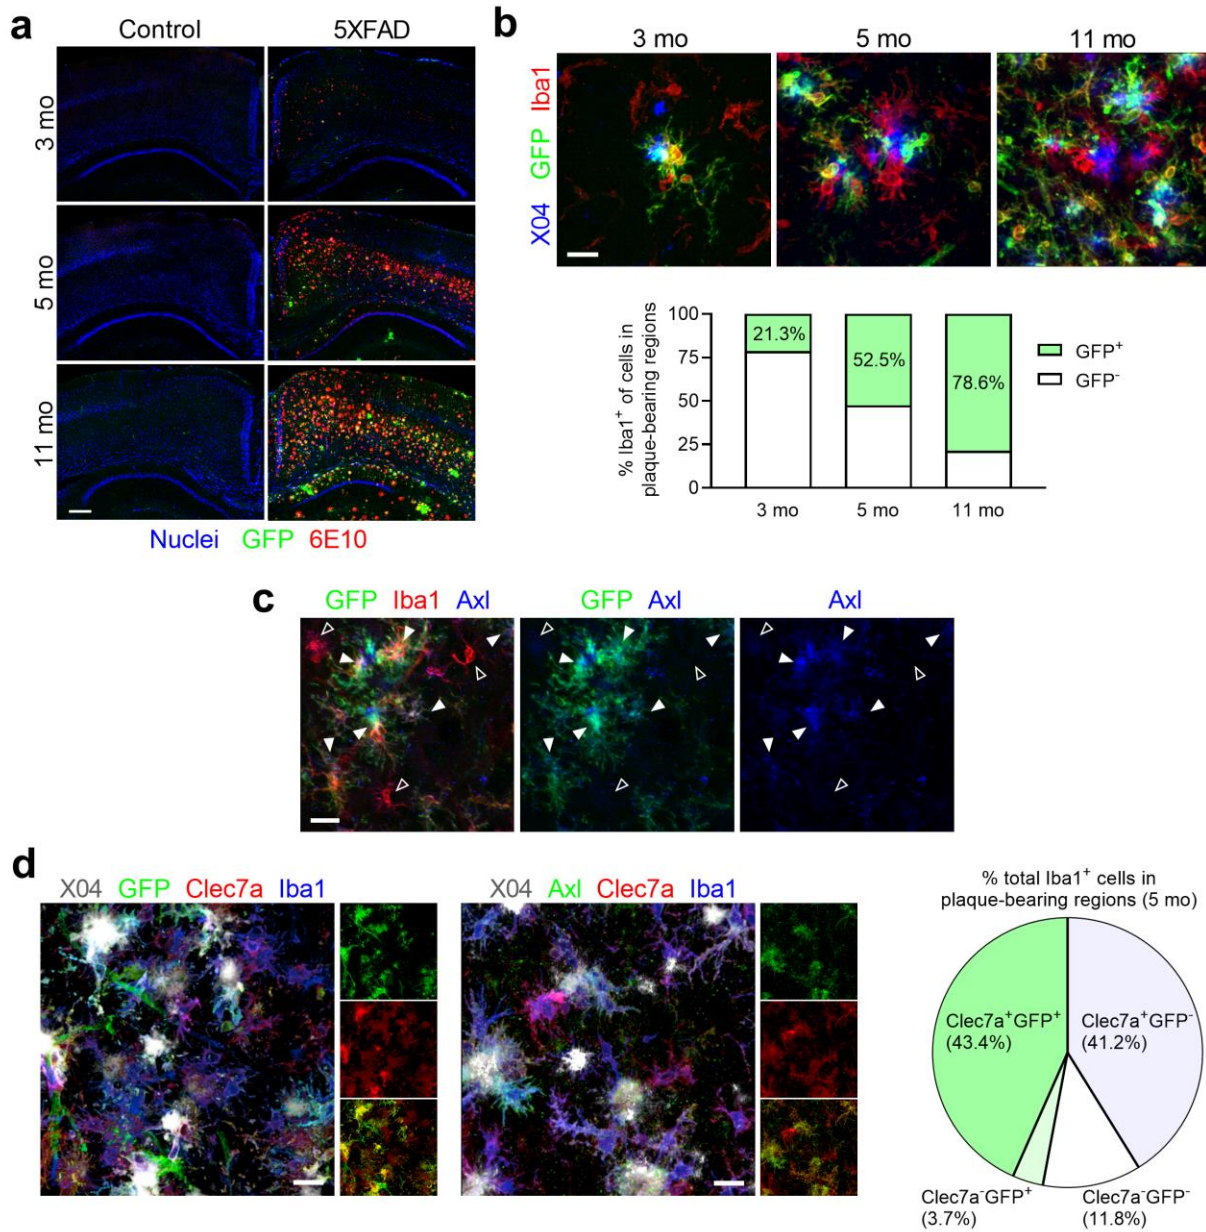

814

815

816

817

**Fig. 2**

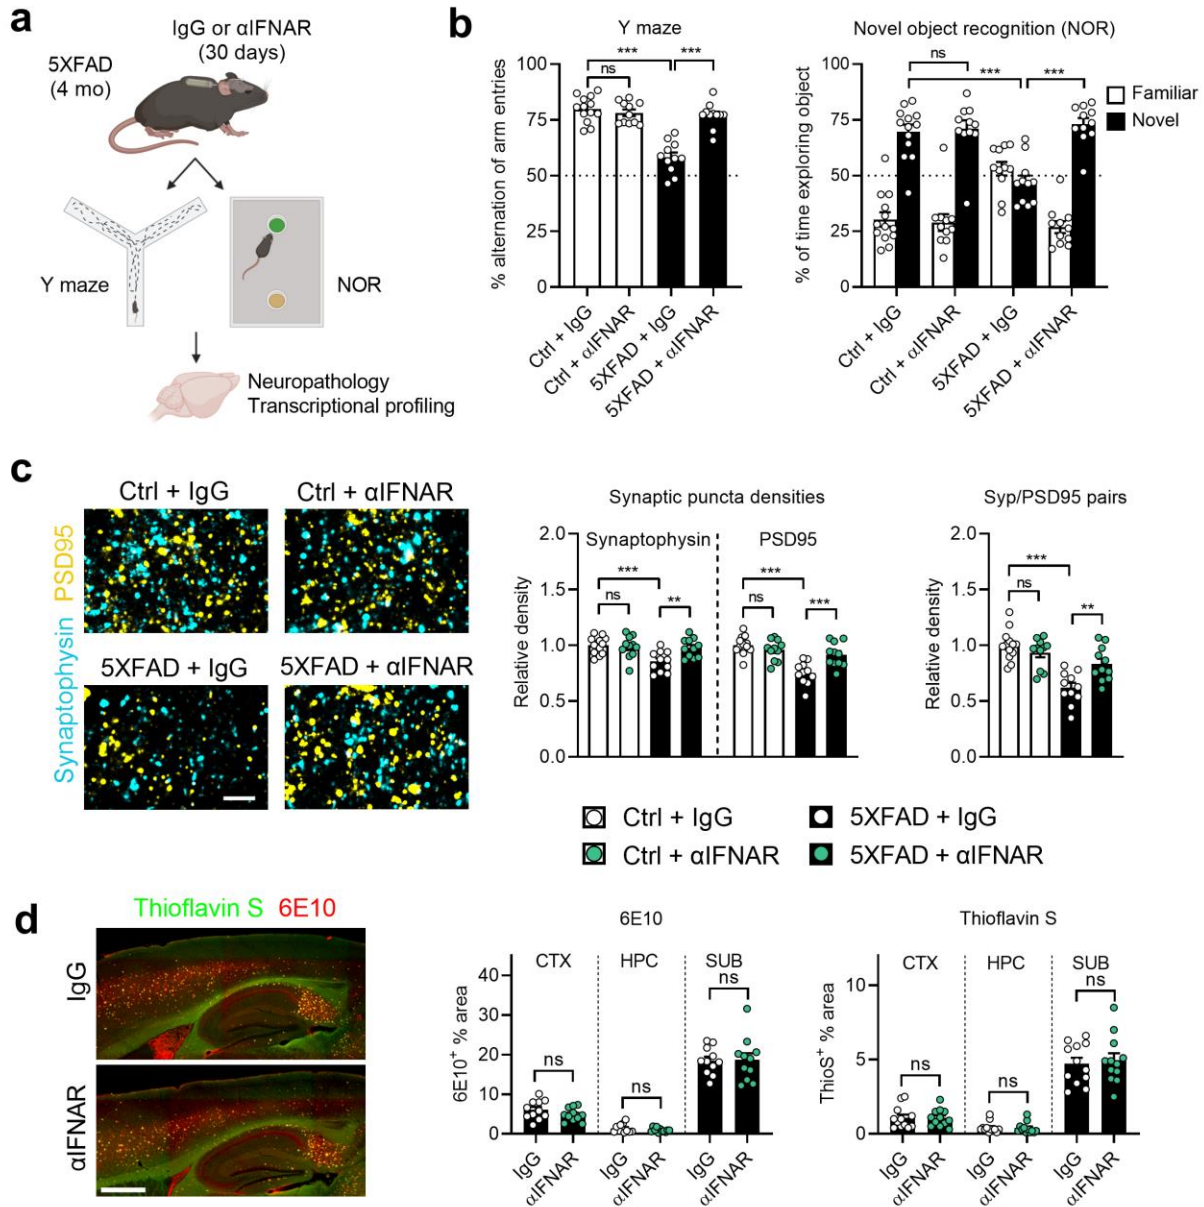

818

819

820

821

**Fig. 3**

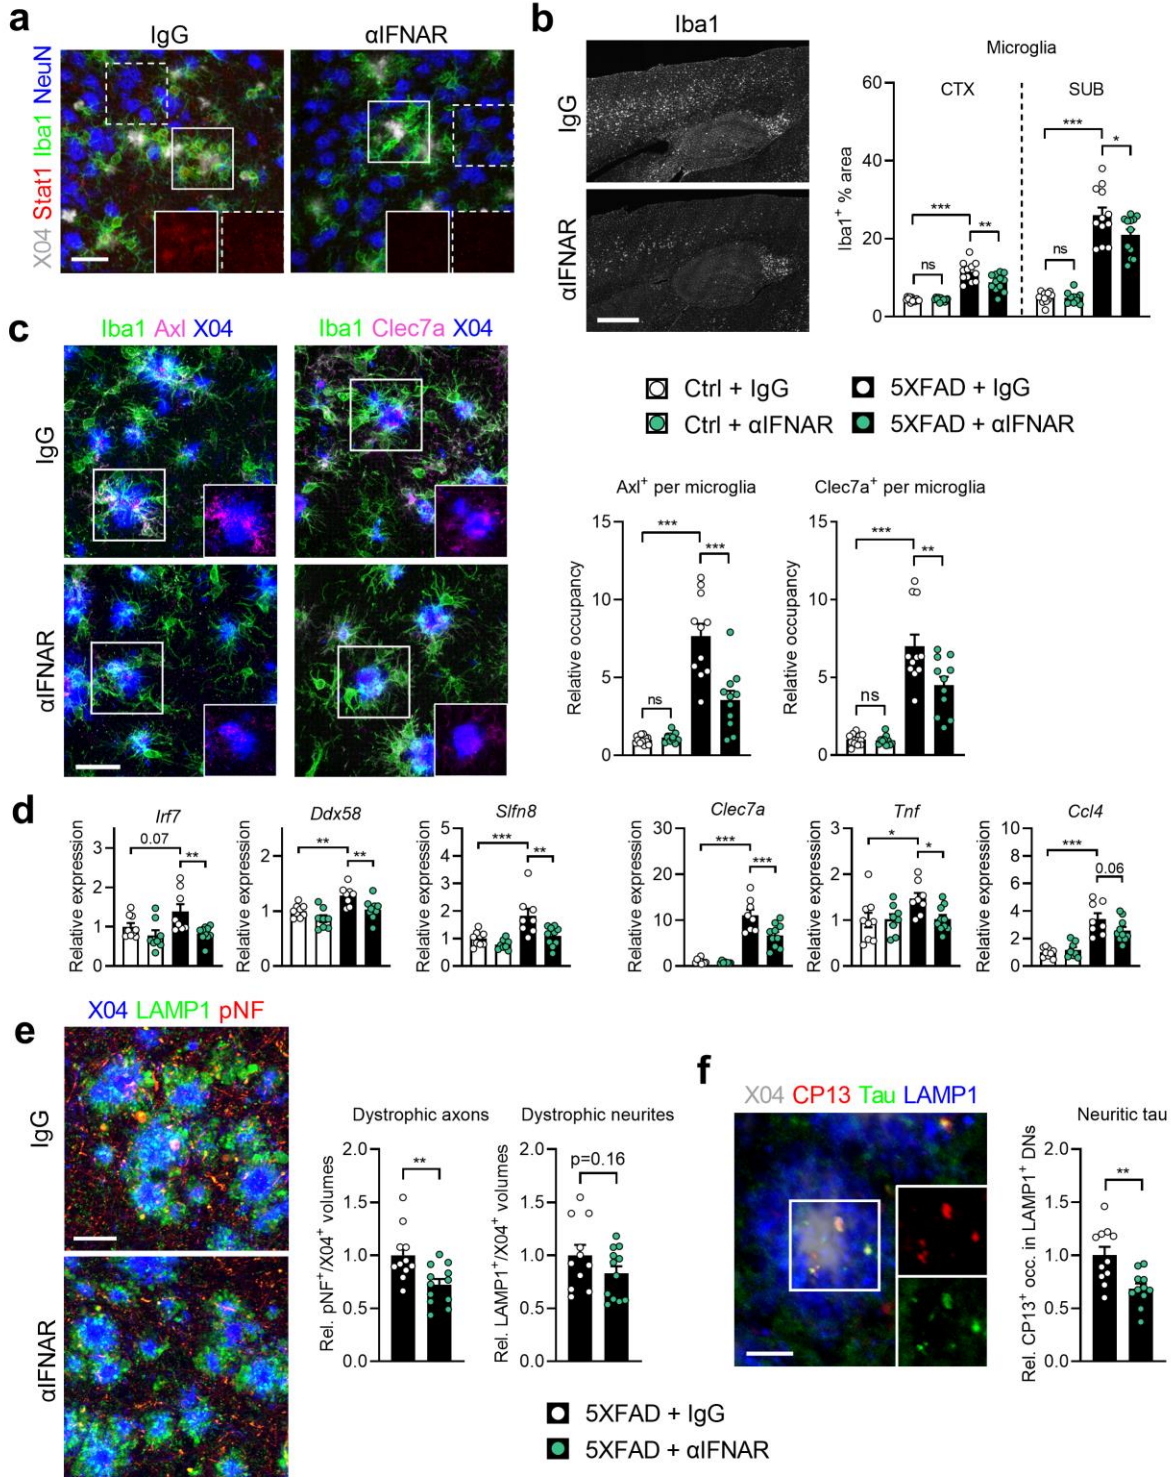

822

823

**Fig. 4**

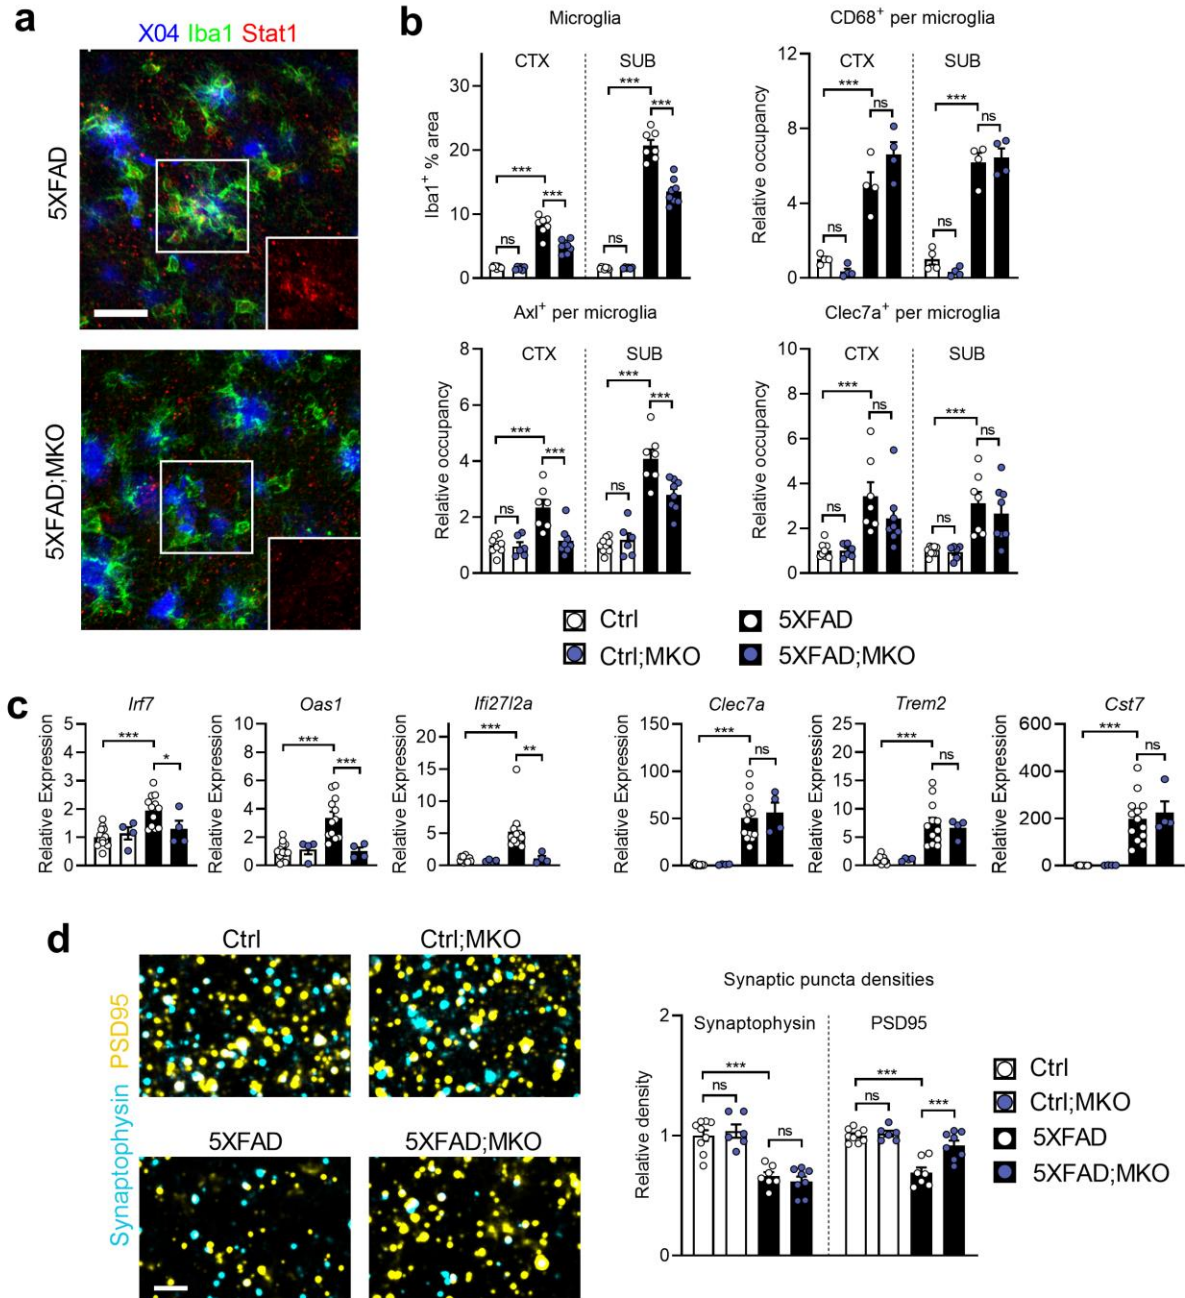

824

825

826

**Fig. 5**

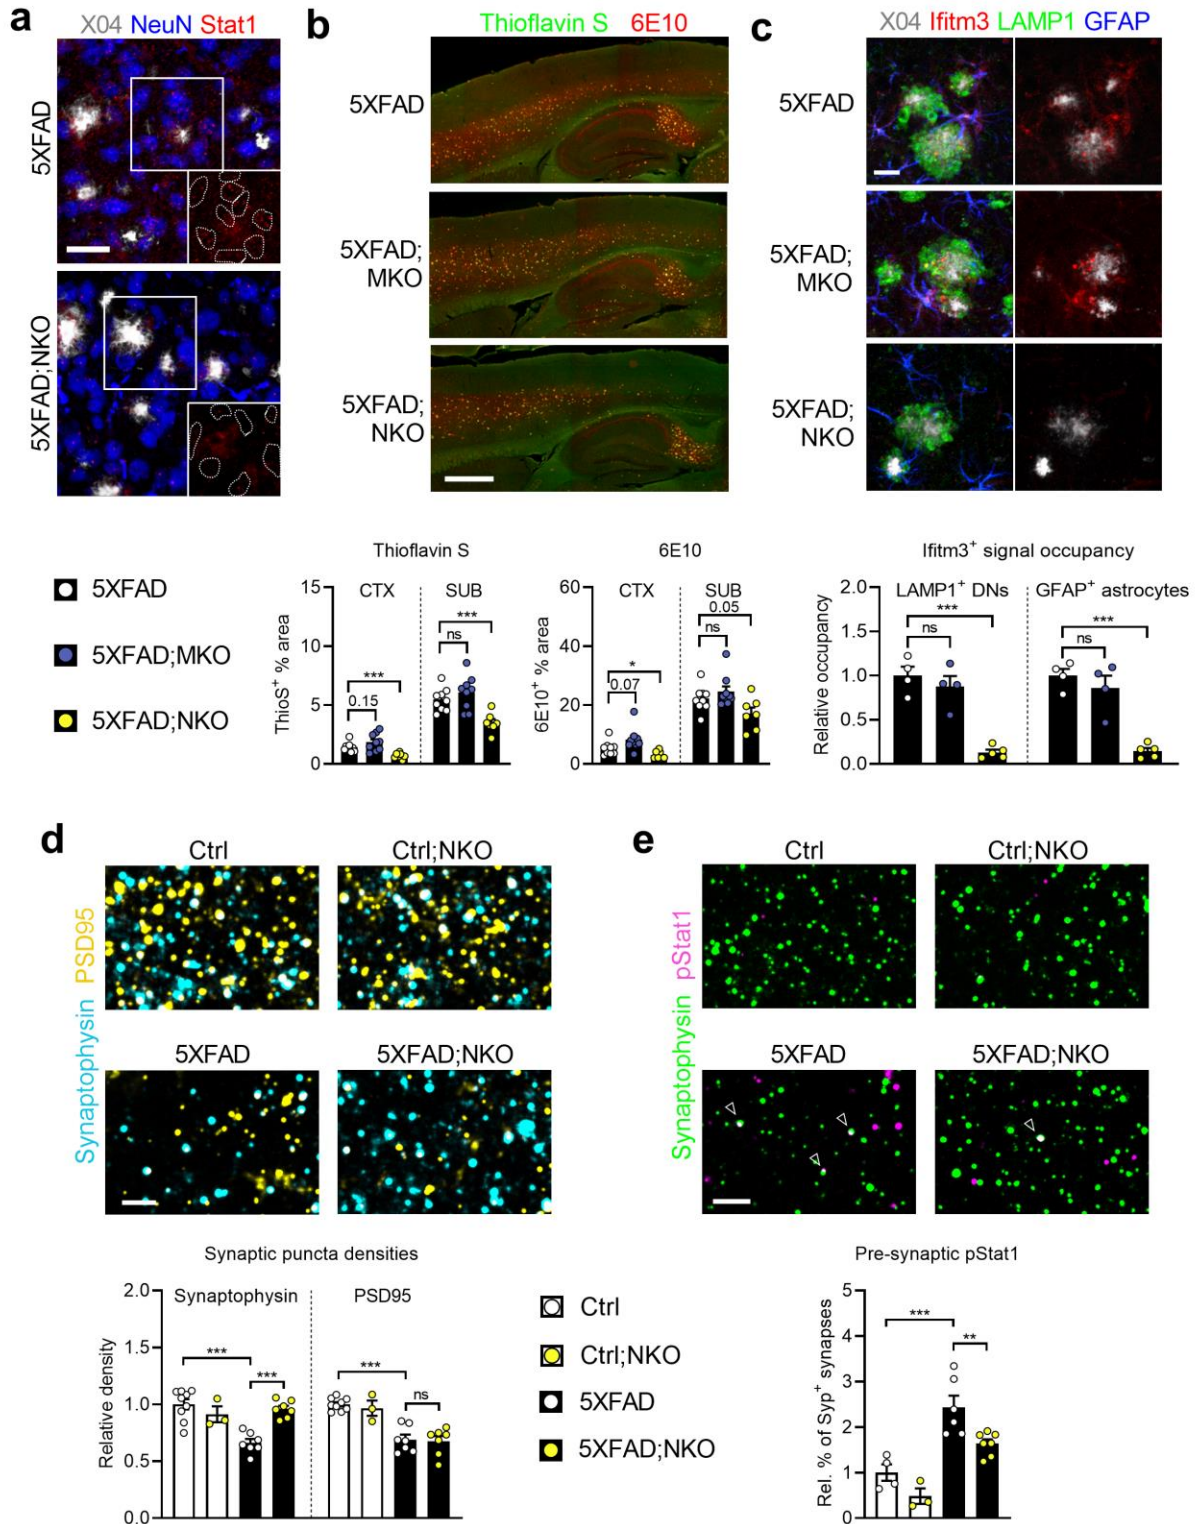



**Fig. 6**

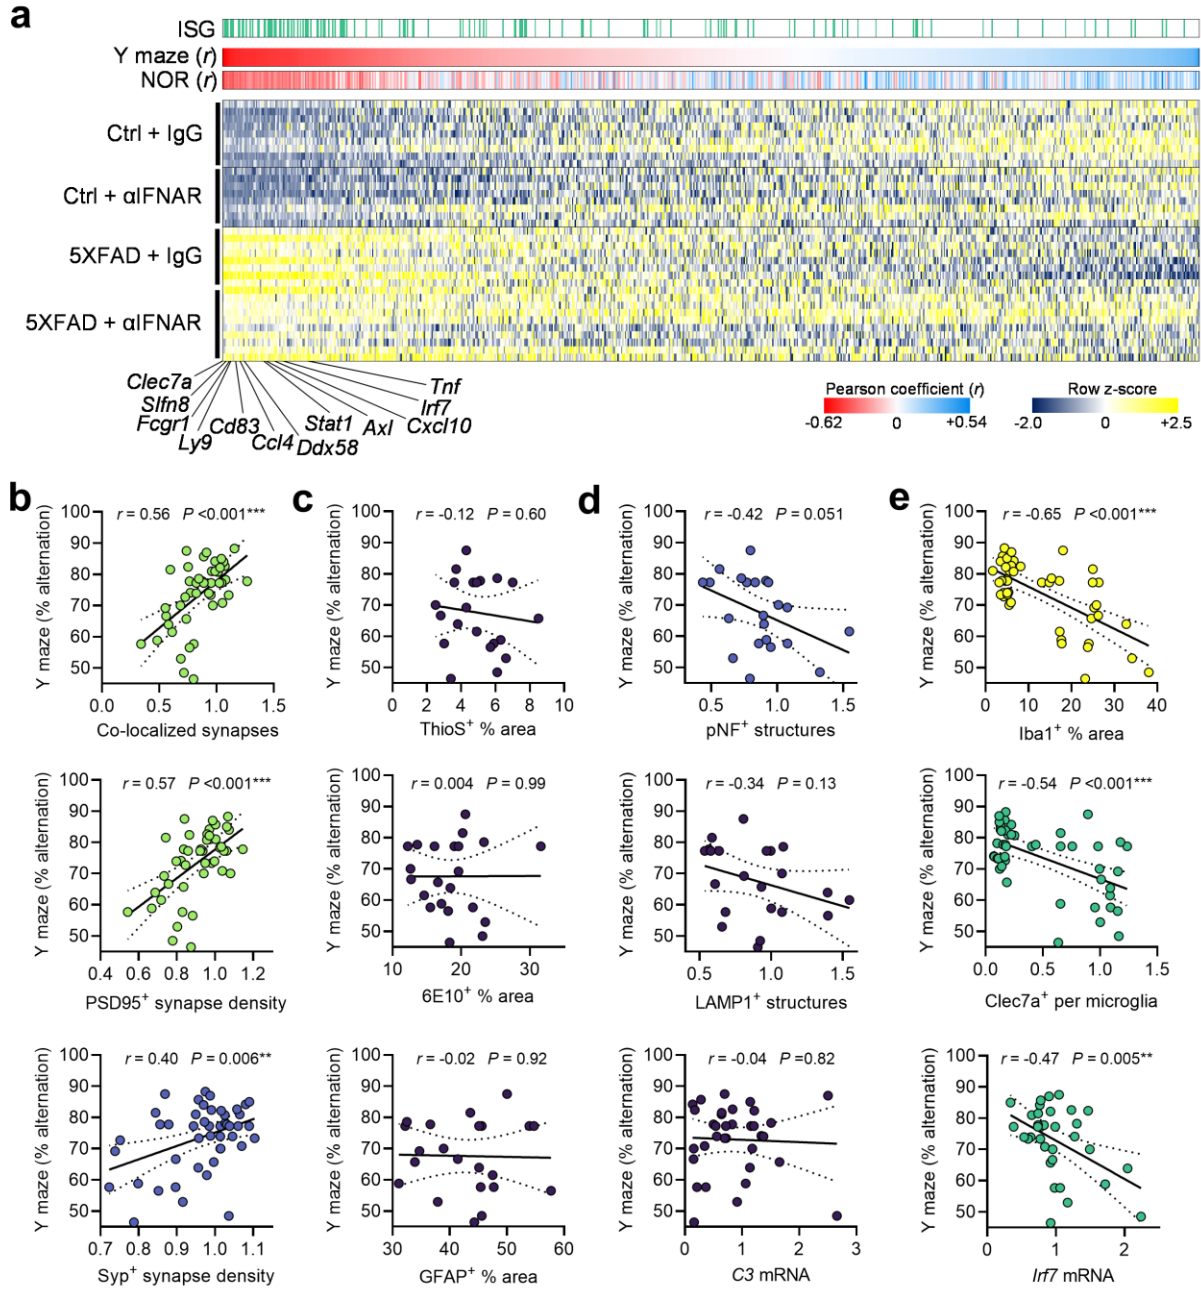

828

829

830

831

**Fig. 7**

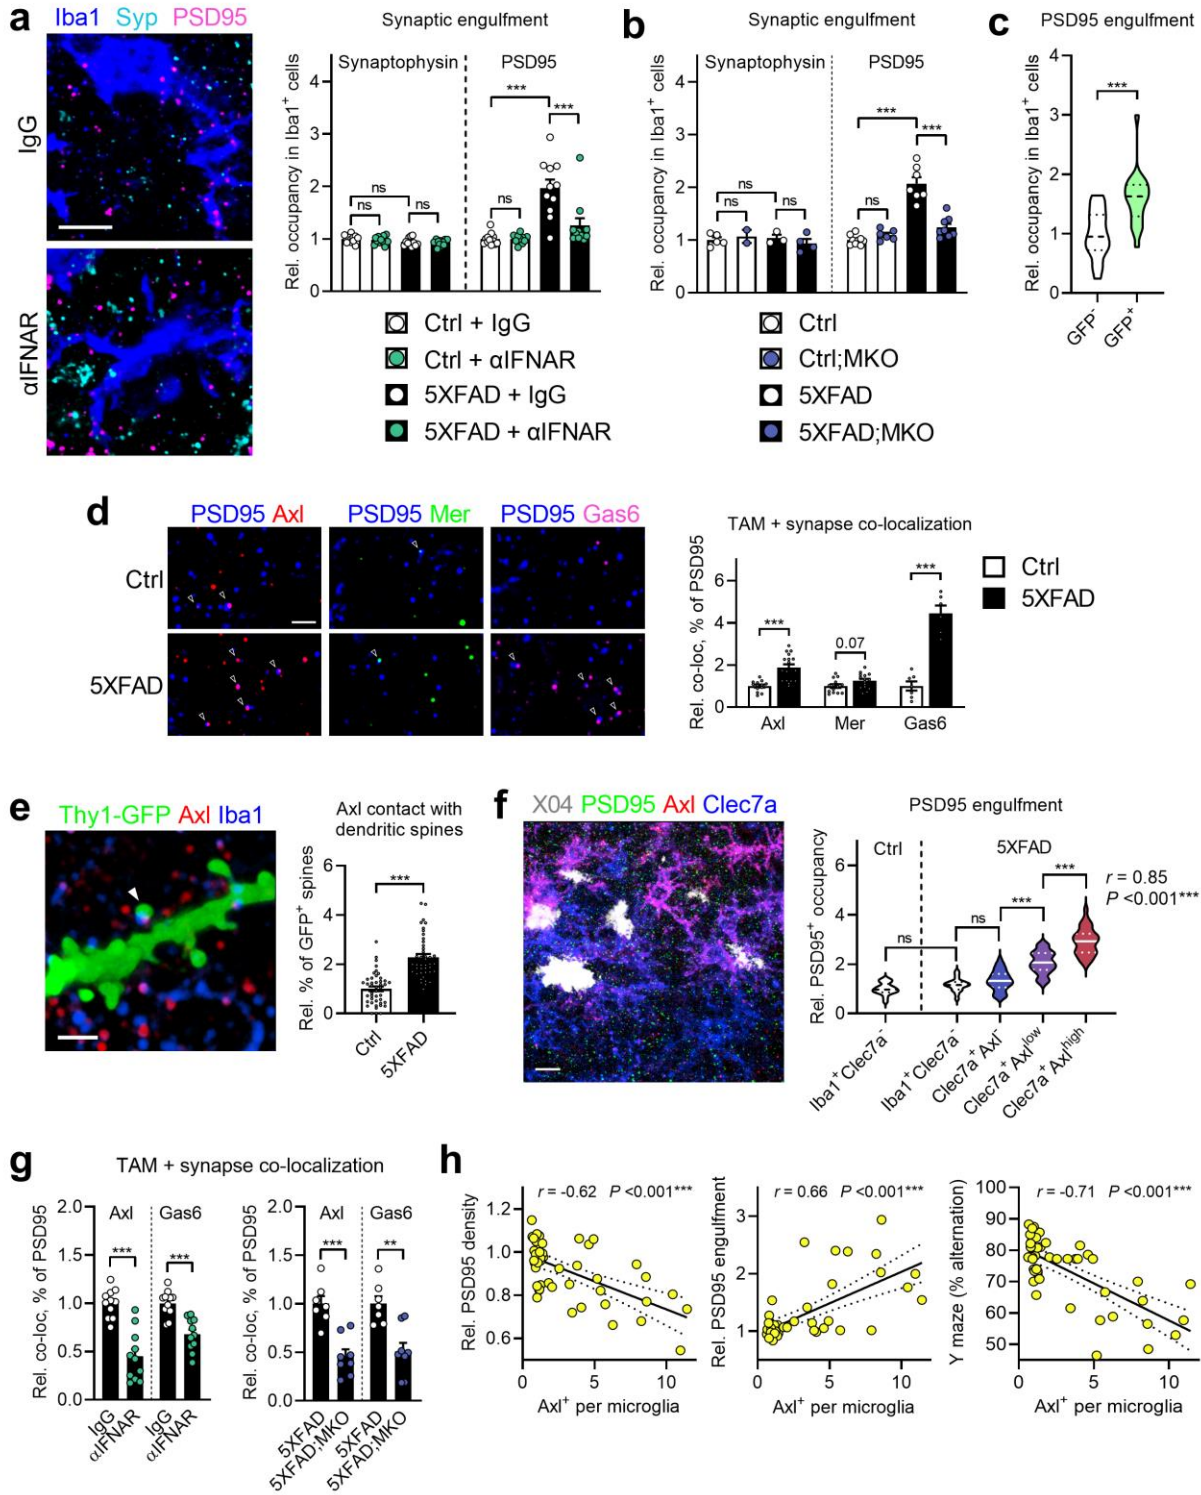

Source: https://www.biorxiv.org/content/biorxiv/early/2021/11/03/2021.11.01.466525.full.pdf
